# Supplementary material for: A facile and green approach for the synthesis of spiro[naphthalene-2,5′-pyrimidine]-4-carbonitrile via a one-pot three-component condensation reaction using DBU as a catalyst
Source: Royal Society of Chemistry journal article supplement (doi:10.1039/c5ra22817d), 2015-12-15
Supplement: c5ra22817d1.pdf [file c5ra22817d1.pdf]

**A Facile and Green Approach for the Synthesis of Spiro[naphthalene-2,5'-pyrimidine]-4-carbonitrile via One-Pot Three-Component Condensation Reaction using DBU as Catalyst**

**Rajeswari M., Pooja Saluja and Jitender M. Khurana \***

*Department of Chemistry, University of Delhi, New Delhi -110 007, India.*

*Fax: +91 11 27666605; Tel: +91 11 27667725; Email: [jmkhurana@chemistry.du.ac.in](mailto:jmkhurana@chemistry.du.ac.in).*

**Table of contents**

|                                                                                           |                   |
|-------------------------------------------------------------------------------------------|-------------------|
| <b>Spectral data.....</b>                                                                 | <b>Page 2-10</b>  |
| <b>Copies of <sup>1</sup>H NMR, <sup>13</sup>C NMR and Mass spectra of compounds.....</b> | <b>Page 11-44</b> |
| <b>Crystal Refinement data and hydrogen bonding of compound 4a.....</b>                   | <b>Page 45-47</b> |

## Supplementary data

### 3-amino-1-(4-chlorophenyl)-1',3'-dimethyl-2',4',6'-trioxo-2',3',4',6,6',7,8,8a-octahydro-1*H*,1'*H*-spiro[naphthalene-2,5'-pyrimidine]-4-carbonitrile (C<sub>22</sub>H<sub>21</sub>ClN<sub>4</sub>O<sub>3</sub>, 4a)

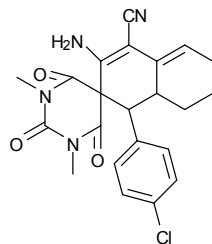

White solid; Yield: 89%; M.p. (°C): 286-288; IR (CHCl<sub>3</sub>)  $\nu_{\max}/\text{cm}^{-1}$ : 2195, 1676, 1426, 1376 ; <sup>1</sup>H NMR (400 MHz, DMSO-*d*<sub>6</sub>)  $\delta_{\text{H}}$ : 7.39 (d, 1H, *J* = 7.63 Hz, Ar-H), 7.32 (d, 1H, *J* = 7.63 Hz, Ar-H), 6.93 (d, 1H, *J* = 8.39 Hz, Ar-H), 6.88 (d, 1H, *J* = 7.63 Hz, Ar-H), 6.53 (s, 2H, -NH<sub>2</sub>), 5.59 (s, 1H, vinylic), 3.35 (m, 1H, -CH), 3.07 (d, 1H, *J* = 12.21 Hz, -CH), 2.91 (s, 3H, -CH<sub>3</sub>), 2.89 (s, 3H, -CH<sub>3</sub>), 2.16-2.12 (m, 1H, -CH<sub>2</sub>), 2.04-2.03 (m, 1H, -CH<sub>2</sub>), 1.63-1.62 (m, 1H, -CH<sub>2</sub>), 1.37-1.28 (m, 2H, -CH<sub>2</sub>), 0.79-0.70 (m, 1H, -CH<sub>2</sub>); <sup>13</sup>C NMR (100 MHz, DMSO-*d*<sub>6</sub>)  $\delta_{\text{C}}$ : 168.5, 166.93, 150.8, 149.6, 133.95, 132.9, 132.1, 130.6, 128.4, 127.8, 117.8, 117.4, 82.11, 60.6, 55.1, 32.2, 28.2, 28.1, 27.3, 24.9, 21.5; LCMS (ESI) *m/z* calcd. for C<sub>22</sub>H<sub>21</sub>ClN<sub>4</sub>O<sub>3</sub>: 424.129 [M<sup>+</sup>]; found: 425.1362 [M+H]<sup>+</sup>.

### 3-amino-1-(4-fluorophenyl)-1',3'-dimethyl-2',4',6'-trioxo-2',3',4',6,6',7,8,8a-octahydro-1*H*,1'*H*-spiro[naphthalene-2,5'-pyrimidine]-4-carbonitrile (C<sub>22</sub>H<sub>21</sub>FN<sub>4</sub>O<sub>3</sub>, 4b)

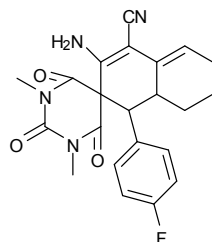

White solid; Yield: 85%; M.p. (°C): 258-260; IR (CHCl<sub>3</sub>)  $\nu_{\max}/\text{cm}^{-1}$ : 2206, 1674, 1595, 1385, 846; <sup>1</sup>H NMR (400 MHz, DMSO-*d*<sub>6</sub>)  $\delta_{\text{H}}$ : 7.16-7.13 (dt, 1H, Ar-H), 7.08-7.04 (dt, 1H, Ar-H), 6.94-6.91 (t, 1H, Ar-H), 6.89-6.86 (t, 1H, Ar-H), 6.50 (s, 2H, -NH<sub>2</sub>), 5.57 (s, 1H, vinylic), 3.33 (m, 1H, -CH), 3.30 (d, 1H, *J* = 12.9 Hz, -CH), 2.88 (s, 3H, -CH<sub>3</sub>), 2.86 (s, 3H, -CH<sub>2</sub>), 2.15-2.10 (m, 1H, -CH<sub>2</sub>), 2.03-1.97 (m, 1H, -CH<sub>2</sub>), 1.63-1.61 (m, 1H, -CH<sub>2</sub>), 1.37-1.28 (m, 2H, -CH<sub>2</sub>), 0.77-0.68 (m, 1H, -CH<sub>2</sub>); <sup>13</sup>C NMR (100 MHz, DMSO-*d*<sub>6</sub>)  $\delta_{\text{C}}$ : 168.5, 167.0, 161.7, 150.9,

149.7, 132.3, 131.1, 130.7, 128.0, 127.9, 117.7, 117.3, 115.2, 82.1, 60.8, 55.1, 32.2, 28.1, 28.1, 27.3, 24.9, 21.6; LCMS (ESI)  $m/z$  calcd. for  $C_{22}H_{21}FN_4O_3$  : 408.1621  $[M^+]$ ; found: 409.1695  $[M+H]^+$ .

**3-amino-1-(4-methoxyphenyl)-1',3'-dimethyl-2',4',6'-trioxo-2',3',4',6,6',7,8,8a-octahydro-1H,1'H-spiro[naphthalene-2,5'-pyrimidine]-4-carbonitrile ( $C_{23}H_{24}N_4O_4$ , 4c)**

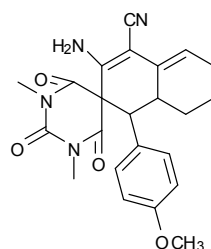

White solid; Yield: 92%; M.p. ( $^{\circ}C$ ): 253-255; IR ( $CHCl_3$ )  $\nu_{max}/cm^{-1}$ : 2206, 1688, 1436, 1264;  $^1H$  NMR (400 MHz,  $DMSO-d_6$ )  $\delta_H$ : 6.87-6.77 (m, 4H, Ar-H), 6.49 (s, 2H,  $-NH_2$ ), 5.57 (s, 1H, vinylic), 3.68 (s, 3H,  $-OCH_3$ ), 3.35 (m, 1H,  $-CH$ ), 2.99-2.96 (m, 1H,  $-CH$ ), 2.90 (s, 3H,  $-CH_3$ ), 2.88 (s, 3H,  $-CH_3$ ), 2.16-2.12 (m, 1H,  $-CH_2$ ), 2.04-1.90 (m, 1H,  $-CH_2$ ), 1.63 (bs, 1H,  $-CH_2$ ), 1.35 (bs, 2H,  $-CH_2$ ), 0.73-0.69 (m, 1H,  $-CH_2$ );  $^{13}C$  NMR (100 MHz,  $DMSO-d_6$ )  $\delta_C$ : 168.8, 167.1, 159.0, 151.1, 149.7, 131.4, 131.0, 126.9, 126.52, 117.8, 117.1, 114.1, 113.2, 82.1, 61.0, 55.4, 55.1, 32.3, 28.1, 28.1, 27.5, 24.9, 21.6; LCMS (ESI)  $m/z$  calcd. for  $C_{23}H_{24}N_4O_4$ : 420.1795  $[M^+]$ ; found: 421.1868  $[M+H]^+$ .

**3-amino-1',3'-dimethyl-2',4',6'-trioxo-1-p-tolyl-2',3',4',6,6',7,8,8a-octahydro-1H,1'H-spiro[naphthalene-2,5'-pyrimidine]-4-carbonitrile ( $C_{23}H_{24}N_4O_3$ , 4d)**

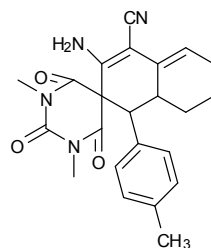

White solid; Yield: 90%; M.p. ( $^{\circ}C$ ): 241-243; IR ( $CHCl_3$ )  $\nu_{max}/cm^{-1}$ : 2206, 1659, 1443, 1372;  $^1H$  NMR (400 MHz,  $DMSO-d_6$ )  $\delta_H$ : 7.10 (d, 1H,  $J=7.63$  Hz, Ar-H), 7.02 (d, 1H,  $J=7.63$  Hz, Ar-H), 6.76 (d, 1H,  $J=8.39$  Hz, Ar-H), 6.68 (d, 1H,  $J=7.63$  Hz, Ar-H), 6.47 (s, 2H,  $-NH_2$ ), 5.56 (s, 1H, vinylic), 3.33 (m, 1H,  $-CH$ ), 2.96 (d, 1H,  $J=12.21$  Hz,  $-CH$ ), 2.87 (s, 3H,  $-CH_2$ ), 2.84 (s, 3H,  $-CH_2$ ), 2.20 (s, 3H,  $-CH_3$ ), 2.15-2.09 (m, 1H,  $-CH_2$ ), 2.03-1.96 (m, 1H,  $-CH_2$ ), 1.62-1.59

(m, 1H, -CH<sub>2</sub>), 1.39-1.29 (m, 2H, -CH<sub>2</sub>), 0.73-0.63 (m, 1H, -CH<sub>2</sub>); <sup>13</sup>C NMR (100 MHz, DMSO-*d*<sub>6</sub>) δ<sub>C</sub>: 168.7, 167.1, 151.1, 149.7, 137.5, 131.8, 131.0, 130.2, 128.8, 125.6, 117.8, 117.1, 82.1, 60.8, 55.7, 32.3, 28.1, 28.1, 27.5, 24.9, 21.6, 20.7; LCMS (ESI) *m/z* calcd. for C<sub>23</sub>H<sub>24</sub>N<sub>4</sub>O<sub>3</sub>: 404.1853 [M<sup>+</sup>]; found: 405.1926 [M+H]<sup>+</sup>.

**3-amino-1',3'-dimethyl-1-(4-nitrophenyl)-2',4',6'-trioxo-2',3',4',6,6',7,8,8a-octahydro-1H,1'H-spiro[naphthalene-2,5'-pyrimidine]-4-carbonitrile (C<sub>23</sub>H<sub>24</sub>N<sub>4</sub>O<sub>3</sub>, 4e)**

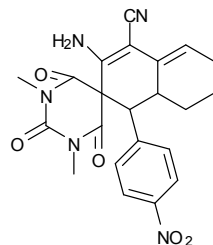

Pale yellow solid; Yield: 91%; M.p. (°C): 251-253; IR (CHCl<sub>3</sub>) ν<sub>max</sub>/cm<sup>-1</sup>: 2206, 1681, 1429, 1349; <sup>1</sup>H NMR (400 MHz, DMSO-*d*<sub>6</sub>) δ<sub>H</sub>: 8.18 (dd, 1H, *J*= 8.77 and 3.05 Hz, Ar-H), 8.11 (dd, 1H, *J*= 8.39 and 2.29 Hz, Ar-H), 7.20 (d, 1H, *J*= 8.39 Hz, Ar-H), 7.16 (d, 1H, *J*=9.92 Hz, Ar-H), 6.54 (s, 2H, -NH<sub>2</sub>), 5.60 (s, 1H, vinylic), 3.24 (d, 1H, *J*= 12.3 Hz, -CH), 2.97-2.95 (m, 1H, -CH), 2.90 (s, 3H, -CH<sub>3</sub>), 2.87 (s, 3H, -CH<sub>3</sub>), 2.16-2.11 (m, 1H, -CH<sub>2</sub>), 2.02-1.97 (m, 1H, -CH<sub>2</sub>), 1.63-1.61 (m, 1H, -CH<sub>2</sub>), 1.41-1.35 (m, 1H, -CH<sub>2</sub>), 1.25-1.22 (m, 1H, -CH<sub>2</sub>), 0.81-0.72 (m, 1H, -CH<sub>2</sub>); <sup>13</sup>C NMR (100 MHz, DMSO-*d*<sub>6</sub>) δ<sub>C</sub>: 168.2, 166.7, 150.6, 149.5, 147.2, 142.9, 131.9, 130.2, 127.7, 123.5, 123.3, 117.7, 117.6, 82.1, 60.3, 55.2, 32.2, 28.2, 28.2, 27.2, 24.8, 21.5; LCMS (ESI) *m/z* calcd. for C<sub>22</sub>H<sub>21</sub>N<sub>5</sub>O<sub>5</sub>: 435.1561 [M<sup>+</sup>]; found: 436.1632 [M+H]<sup>+</sup>.

**3-amino-1-(4-isopropylphenyl)-1',3'-dimethyl-2',4',6'-trioxo-2',3',4',6,6',7,8,8a-octahydro-1H,1'H-spiro[naphthalene-2,5'-pyrimidine]-4-carbonitrile (C<sub>25</sub>H<sub>28</sub>N<sub>4</sub>O<sub>3</sub>, 4f)**

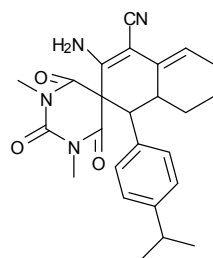

White solid; Yield: 88%; M.p. (°C): 207-209; IR (CHCl<sub>3</sub>) ν<sub>max</sub>/cm<sup>-1</sup>: 2206, 1674, 1436, 1372; <sup>1</sup>H NMR (400 MHz, DMSO-*d*<sub>6</sub>) δ<sub>H</sub>: 7.16 (d, 1H, *J*=8.39 Hz, Ar-H), 7.06 (d, 1H, *J*=9.16 Hz, Ar-H), 6.80 (d, 1H, *J*= 8.39 Hz, Ar-H), 6.70 (d, 1H, *J*= 7.63 Hz, Ar-H), 6.46 (s, 2H, -NH<sub>2</sub>), 5.56 (s,

1H, vinylic), 3.52-3.43 (m, 1H, -CH(CH<sub>3</sub>)<sub>2</sub>), 3.30 (s, 1H, -CH), 2.99-2.95 (m, 1H, -CH), 2.83 (s, 3H, -CH<sub>3</sub>), 2.95 (s, 3H, -CH<sub>3</sub>), 2.15-2.10 (m, 1H, -CH<sub>2</sub>), 2.05-1.91 (m, 1H, -CH<sub>2</sub>), 1.62-1.57 (m, 2H, -CH<sub>2</sub>), 1.40-1.36 (m, 1H, -CH<sub>2</sub>), 1.10 (s, 3H, -CH<sub>3</sub>), 1.08 (s, 3H, -CH<sub>3</sub>), 0.79-0.71 (m, 1H, -CH<sub>2</sub>); <sup>13</sup>C NMR (100 MHz, DMSO-*d*<sub>6</sub>) δ<sub>C</sub>: 168.7, 167.1, 151.1, 149.5, 148.7, 132.0, 130.9, 130.1, 126.0, 125.9, 125.7, 117.8, 117.1, 82.1, 61.0, 55.8, 33.1, 32.0, 28.2, 28.1, 27.5, 24.9, 23.8, 23.7, 21.6; LCMS (ESI) *m/z* calcd. for C<sub>25</sub>H<sub>28</sub>N<sub>4</sub>O<sub>3</sub>: 432.2167 [M<sup>+</sup>]; found: 433.2238 [M+H]<sup>+</sup>.

**3-amino-1-(3-bromophenyl)-1',3'-dimethyl-2',4',6'-trioxo-2',3',4',6,6',7,8,8a-octahydro-1*H*,1'*H*-spiro[naphthalene-2,5'-pyrimidine]-4-carbonitrile (C<sub>22</sub>H<sub>21</sub>BrN<sub>4</sub>O<sub>3</sub>, 4g)**

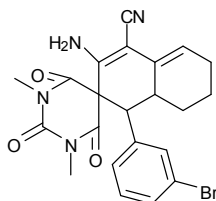

White solid; Yield: 82%; M.p. (°C): 250-253; IR (CHCl<sub>3</sub>) ν<sub>max</sub>/cm<sup>-1</sup>: 2202, 1676, 1434, 1382, 746; <sup>1</sup>H NMR (400 MHz, DMSO-*d*<sub>6</sub>) δ<sub>H</sub>: 7.47 (d, 1H, *J* = 7.63 Hz, Ar-H), 7.23 (td, 1H, *J* = 7.63 Hz, Ar-H), 7.05 (s, 1H, Ar-H), 6.89 (dd, 1H, *J* = 7.63 Hz, Ar-H), 6.50 (s, 2H, -NH<sub>2</sub>), 5.58 (s, 1H, vinylic), 3.29-3.26 (m, 1H, -CH), 3.06 (d, 1H, *J* = 12.21 Hz, -CH), 2.94-2.85 (m, 6H, 2(CH<sub>3</sub>)), 2.15-2.11 (m, 1H, -CH<sub>2</sub>), 2.04-1.97 (m, 1H, -CH<sub>2</sub>), 1.64-1.61 (m, 1H, -CH<sub>2</sub>), 1.43-1.30 (m, 2H, -CH<sub>2</sub>), 0.83-0.71 (m, 1H, -CH<sub>2</sub>); <sup>13</sup>C NMR (100 MHz, DMSO-*d*<sub>6</sub>) δ<sub>C</sub>: 168.4, 168.3, 167.0, 166.7, 150.7, 149.6, 137.6, 132.8, 131.4, 130.6, 129.4, 128.6, 117.7, 117.6, 82.1, 60.7, 55.5, 32.0, 28.2, 27.2, 24.9, 21.5; LCMS (ESI) *m/z* calcd. for C<sub>22</sub>H<sub>21</sub>BrN<sub>4</sub>O<sub>3</sub>: 468.0789 [M<sup>+</sup>]; found: 469.0855 [M+H]<sup>+</sup>, 471.0856 [M+(H+2)]<sup>+</sup>.

**3-amino-1-(2-methoxyphenyl)-1',3'-dimethyl-2',4',6'-trioxo-2',3',4',6,6',7,8,8a-octahydro-1*H*,1'*H*-spiro[naphthalene-2,5'-pyrimidine]-4-carbonitrile (C<sub>23</sub>H<sub>24</sub>N<sub>4</sub>O<sub>4</sub>, 4h)**

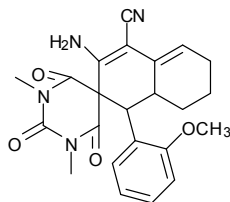

White solid; Yield: 91%; M.p. (°C): 243-246; IR (CHCl<sub>3</sub>)  $\nu_{\max}/\text{cm}^{-1}$ : 2202, 1682, 1426, 1382; <sup>1</sup>H NMR (400 MHz, DMSO-*d*<sub>6</sub>)  $\delta_{\text{H}}$ : 6.87 (d, 1H, *J*= 8.39 Hz, Ar-H), 6.79-6.70 (m, 3H, Ar-H), 6.46 (s, 2H, -NH<sub>2</sub>), 5.55 (s, 1H, vinylic), 3.66 (s, 3H, -OCH<sub>3</sub>), 3.30-3.27 (m, 1H, -CH), 2.95 (d, 1H, *J*= 12.97 Hz, -CH), 2.88 (s, 3H, -CH<sub>3</sub>), 2.86 (s, 3H, -CH<sub>3</sub>), 2.14-2.09 (m, 1H, -CH<sub>2</sub>), 2.04-1.96 (m, 1H, -CH<sub>2</sub>), 1.65-1.60 (m, 1H, -CH<sub>2</sub>), 1.33-1.30 (m, 2H, -CH<sub>2</sub>), 0.73-0.64 (m, 1H, -CH<sub>2</sub>); <sup>13</sup>C NMR (100 MHz, DMSO-*d*<sub>6</sub>)  $\delta_{\text{C}}$ : 168.84, 167.2, 159.0, 151.1, 149.7, 131.4, 131.0, 126.9, 126.5, 117.8, 117.1, 114.1, 113.3, 82.1, 61.0, 55.4, 55.1, 32.4, 28.2, 28.1, 27.5, 24.9, 21.6; LCMS (ESI) *m/z* calcd. for C<sub>23</sub>H<sub>24</sub>N<sub>4</sub>O<sub>4</sub>: 420.18 [M<sup>+</sup>]; found: 421.1874 [M+H]<sup>+</sup>.

**3-amino-1',3'-dimethyl-2',4',6'-trioxo-1-(thiophen-2-yl)-2',3',4',6,6',7,8,8a-octahydro-1H,1'H-spiro[naphthalene-2,5'-pyrimidine]-4-carbonitrile (C<sub>20</sub>H<sub>20</sub>N<sub>4</sub>O<sub>3</sub>S, 4i)**

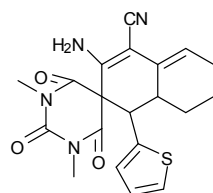

Pale pink color; Yield: 87%; M.p. (°C): 236-239; IR (CHCl<sub>3</sub>)  $\nu_{\max}/\text{cm}^{-1}$ : 2210, 1667, 1449, 1382; <sup>1</sup>H NMR (400 MHz, DMSO-*d*<sub>6</sub>)  $\delta_{\text{H}}$ : 7.42 (s, 1H, Ar-H), 6.90-6.58 (m, 1H, Ar-H), 6.68-6.67 (m, 1H, Ar-H), 6.50 (s, 2H, -NH<sub>2</sub>), 5.55 (s, 1H, vinylic), 2.94 (s, 3H, -CH<sub>3</sub>), 2.91 (s, 3H, -CH<sub>3</sub>), 2.86-2.75 (m, 1H, -CH), 2.48 (d, 1H, *J*= 3.81 Hz, -CH), 2.15-2.09 (m, 1H, -CH<sub>2</sub>), 2.03-2.01 (m, 1H, -CH<sub>2</sub>), 1.65-1.63 (m, 1H, -CH<sub>2</sub>), 1.44-1.42 (m, 1H, -CH<sub>2</sub>), 1.35-1.31 (m, 1H, -CH<sub>2</sub>), 0.83-0.74 (m, 1H, -CH<sub>2</sub>); <sup>13</sup>C NMR (100 MHz, DMSO-*d*<sub>6</sub>)  $\delta_{\text{C}}$ : 168.7, 167.1, 166.1, 150.6, 150.1, 149.8, 130.4, 130.0, 125.9, 124.7, 117.6, 82.0, 60.6, 59.3, 36.9, 34.3, 28.4, 27.3, 24.9, 21.5; LCMS (ESI) *m/z* calcd. for C<sub>20</sub>H<sub>20</sub>N<sub>4</sub>O<sub>3</sub>S: 396.1248 [M<sup>+</sup>]; found: 397.1325 [M+H]<sup>+</sup>.

**3-amino-1-(4-(dimethylamino)phenyl)-1',3'-dimethyl-2',4',6'-trioxo-2',3',4',6,6',7,8,8a-octahydro-1H,1'H-spiro[naphthalene-2,5'-pyrimidine]-4-carbonitrile (C<sub>24</sub>H<sub>27</sub>N<sub>5</sub>O<sub>3</sub>, 4j)**

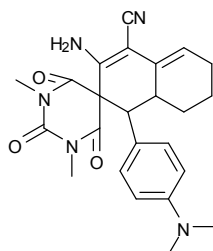

Crime color; Yield: 89%; M.p. (°C): 272-274; IR (CHCl<sub>3</sub>)  $\nu_{\max}/\text{cm}^{-1}$ : 2210, 1667, 1419, 1361; <sup>1</sup>H NMR (400 MHz, DMSO-*d*<sub>6</sub>)  $\delta_{\text{H}}$ : 6.67-6.57 (m, 3H, Ar-H), 6.50-7.47 (d, 1H, *J*= 8.39 Hz, Ar-H), 6.44 (s, 2H, -NH<sub>2</sub>), 5.54 (s, 1H, vinylic), 3.34 (m, 1H, -CH), 3.29-3.25 (m, 1H, -CH), 2.88 (s, 3H, -CH<sub>3</sub>), 2.86 (s, 3H, -CH<sub>3</sub>), 2.80 (s, 6H, -N(CH<sub>3</sub>)<sub>2</sub>), 2.13-2.09 (m, 1H, -CH<sub>2</sub>), 2.02-2.00 (m, 1H, -CH<sub>2</sub>), 1.60 (bs, 1H, -CH<sub>2</sub>), 1.35-1.33 (m, 2H, -CH<sub>2</sub>), 0.70-0.62 (m, 1H, -CH<sub>2</sub>); <sup>13</sup>C NMR (100 MHz, DMSO-*d*<sub>6</sub>)  $\delta_{\text{C}}$ : 169.4, 167.7, 151.7, 150.4, 150.2, 131.7, 131.2, 126.6, 121.7, 118.3, 117.3, 112.4, 111.7, 82.5, 61.6, 56.0, 32.9, 28.6, 28.0, 25.4, 22.1; LCMS (ESI) *m/z* calcd. for C<sub>24</sub>H<sub>27</sub>N<sub>5</sub>O<sub>3</sub>: 433.2132 [M<sup>+</sup>]; found: 434.2206 [M+H]<sup>+</sup>.

**3-amino-1-(3-chlorophenyl)-1',3'-dimethyl-2',4',6'-trioxo-2',3',4',6,6',7,8,8a-octahydro-1*H*,1'*H*-spiro[naphthalene-2,5'-pyrimidine]-4-carbonitrile (C<sub>22</sub>H<sub>21</sub>ClN<sub>4</sub>O<sub>3</sub>, 4k)**

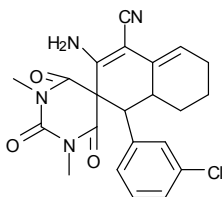

White solid; Yield: 82%; M.p. (°C): 275-277; IR (CHCl<sub>3</sub>)  $\nu_{\max}/\text{cm}^{-1}$ : 2195, 1676, 1441, 1382; <sup>1</sup>H NMR (400 MHz, DMSO-*d*<sub>6</sub>)  $\delta_{\text{H}}$ : 7.38-7.27 (m, 2H, Ar-H), 6.94 (s, 1H, Ar-H), 6.90-6.84 (m, 1H, Ar-H), 6.53 (s, 2H, -NH<sub>2</sub>), 5.60 (s, 1H, vinylic), 3.36 (m, 1H, -CH), 3.09 (d, 1H, *J*= 12.21 Hz, -CH), 2.17-2.13 (m, 1H, -CH<sub>2</sub>), 2.05-2.02 (m, 1H, -CH<sub>2</sub>), 1.67-1.65 (m, 1H, -CH<sub>2</sub>), 1.42-1.32 (m, 2H, -CH<sub>2</sub>), 0.85-0.73 (m, 1H, -CH<sub>2</sub>); <sup>13</sup>C NMR (100 MHz, DMSO-*d*<sub>6</sub>)  $\delta_{\text{C}}$ : 168.4, 167.0, 150.7, 149.6, 137.4, 133.3, 132.9, 130.0, 128.9, 128.6, 128.3, 117.7, 117.4, 82.1, 60.6, 55.3, 32.0, 28.1, 28.0, 27.4, 24.9, 21.5; LCMS (ESI) *m/z* calcd. for C<sub>22</sub>H<sub>21</sub>ClN<sub>4</sub>O<sub>3</sub>: 424.129 [M<sup>+</sup>]; found: 425.1363 [M+H]<sup>+</sup>.

**3-amino-1-(2-chlorophenyl)-1',3'-dimethyl-2',4',6'-trioxo-2',3',4',6,6',7,8,8a-octahydro-1*H*,1'*H*-spiro[naphthalene-2,5'-pyrimidine]-4-carbonitrile (C<sub>22</sub>H<sub>21</sub>ClN<sub>4</sub>O<sub>3</sub>, 4l)**

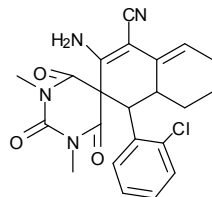

White solid; Yield: 93%; M.p. (°C): 242-244; IR (CHCl<sub>3</sub>)  $\nu_{\max}/\text{cm}^{-1}$ : 2202, 1667, 1426, 1376, 746; <sup>1</sup>H NMR (400MHz, DMSO-*d*<sub>6</sub>)  $\delta_{\text{H}}$ : 7.40 (d, 1H, *J*= 7.63 Hz, Ar-H), 7.33-7.24 (m, 2H, Ar-

H), 6.97 (d, 1H,  $J=7.63$  Hz, Ar-H), 6.53 (s, 2H, -NH<sub>2</sub>), 5.58 (s, 1H, vinylic), 3.66 (d, 1H,  $J=12.21$  Hz, -CH), 3.302-3.00 (m, 1H, -CH), 2.90 (s, 3H, -CH<sub>3</sub>), 2.88 (s, 3H, -CH<sub>3</sub>), 2.13-2.08 (m, 1H, -CH<sub>2</sub>), 2.01-1.97 (m, 1H, -CH<sub>2</sub>), 1.61-1.58 (m, 1H, -CH<sub>2</sub>), 1.35-1.28 (m, 1H, -CH<sub>2</sub>), 1.19-1.16 (m, 1H, -CH<sub>2</sub>), 0.68-0.60 (m, 1H, -CH<sub>2</sub>); <sup>13</sup>C NMR (100 MHz, DMSO-*d*<sub>6</sub>)  $\delta_C$ : 167.7, 167.1, 151.2, 149.9, 134.5, 132.5, 130.0, 129.7, 128.8, 127.1, 117.8, 117.5, 82.0, 60.0, 50.1, 33.2, 30.8, 28.8, 28.2, 27.4, 24.8, 21.5; LCMS (ESI)  $m/z$  calcd. for C<sub>22</sub>H<sub>21</sub>ClN<sub>4</sub>O<sub>3</sub>: 424.1298 [M<sup>+</sup>]; found: 425.1369 [M+H]<sup>+</sup>.

**3-amino-1-(4-bromophenyl)-1',3'-dimethyl-2',4',6'-trioxo-2',3',4',6,6',7,8,8a-octahydro-1H,1'H-spiro[naphthalene-2,5'-pyrimidine]-4-carbonitrile (C<sub>22</sub>H<sub>21</sub>BrN<sub>4</sub>O<sub>3</sub>, 4m)**

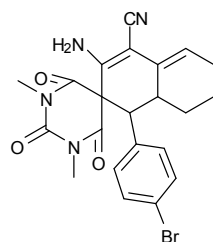

White solid; Yield: 90%; M.p. (°C): 261-263; IR (CHCl<sub>3</sub>)  $\nu_{\max}/\text{cm}^{-1}$ : 2195, 1676, 1382; <sup>1</sup>H NMR (400 MHz, DMSO-*d*<sub>6</sub>)  $\delta_H$ : 7.50 (d, 1H,  $J=8.39$  Hz, Ar-H), 7.43 (d, 1H,  $J=7.63$  Hz, Ar-H), 6.84 (d, 1H,  $J=8.39$  Hz, Ar-H), 6.79 (d, 1H,  $J=9.92$  Hz, Ar-H), 6.49 (s, 2H, -NH<sub>2</sub>), 5.57 (s, 1H, vinylic), 3.37 (m, 1H, -CH), 3.03 (d, 1H,  $J=12.21$  Hz, -CH), 2.14-2.10 (m, 1H, -CH<sub>2</sub>), 2.02-1.96 (m, 1H, -CH<sub>2</sub>), 1.63-1.60 (m, 1H, -CH<sub>2</sub>), 1.39-1.25 (m, 2H, -CH<sub>2</sub>), 0.76-0.67 (m, 1H, -CH<sub>2</sub>); <sup>13</sup>C NMR (100 MHz, DMSO-*d*<sub>6</sub>)  $\delta_C$ : 168.5, 166.9, 150.9, 149.7, 134.3, 132.5, 131.4, 131.3, 130.6, 128.1, 121.5, 117.8, 117.5, 82.1, 60.6, 55.3, 32.2, 28.2, 24.9, 21.6; LCMS (ESI)  $m/z$  calcd. for C<sub>22</sub>H<sub>21</sub>BrN<sub>4</sub>O<sub>3</sub>: 468.0792 [M<sup>+</sup>]; found: 469.0863 [M+H]<sup>+</sup>, 471.0853 [M+(H+2)]<sup>+</sup>.

**3-amino-1',3'-dimethyl-2',4',6'-trioxo-1-(3-(trifluoromethyl)phenyl)-2',3',4',6,6',7,8,8a-octahydro-1H,1'H-spiro[naphthalene-2,5'-pyrimidine]-4-carbonitrile (C<sub>23</sub>H<sub>21</sub>F<sub>3</sub>N<sub>4</sub>O<sub>3</sub>, 4n)**

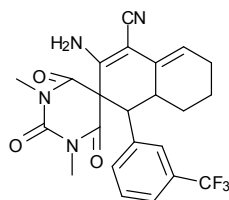

White solid; Yield: 85%; M.p. (°C): 244-246; IR (CHCl<sub>3</sub>)  $\nu_{\max}/\text{cm}^{-1}$ : 2202, 1676, 1434, 1376, 753; <sup>1</sup>H NMR (400 MHz, DMSO-*d*<sub>6</sub>)  $\delta_H$ : 7.68-7.66 (m, 1H, Ar-H), 7.55 (td, 1H,  $J=7.63$  Hz,



Ar-H), 7.26 (d, 1H,  $J=7.63$  Hz, Ar-H), 7.22-7.17 (t, 1H,  $J=9.92$  Hz, Ar-H), 6.55 (s, 2H, -NH<sub>2</sub>), 5.61 (s, 1H, vinylic), 3.25-3.20 (m, 1H, -CH), 3.00 (bs, 1H, -CH), 2.88-2.83 (m, 6H, 2(CH<sub>3</sub>)), 2.17-2.13 (m, 1H, -CH<sub>2</sub>), 2.06-2.00 (m, 1H, -CH<sub>2</sub>), 1.66-1.63 (m, 1H, -CH<sub>2</sub>), 1.44-1.40 (m, 1H, -CH<sub>2</sub>), 1.33-1.24 (m, 1H, -CH<sub>2</sub>), 0.88-0.73 (m, 1H, -CH<sub>2</sub>); <sup>13</sup>C NMR (100 MHz, DMSO-*d*<sub>6</sub>)  $\delta_C$ : 168.3, 166.7, 150.6, 149.5, 136.4, 134.6, 130.4, 129.4, 125.2, 117.7, 117.5, 82.2, 60.7, 55.3, 31.9, 28.2, 28.1, 27.2, 24.8, 21.5; LCMS (ESI)  $m/z$  calcd. for C<sub>23</sub>H<sub>21</sub>F<sub>3</sub>N<sub>4</sub>O<sub>3</sub>: 458.1565 [M<sup>+</sup>]; found: 459.1640 [M+H]<sup>+</sup>.

**3-amino-1',3'-dimethyl-1-(naphthalen-2-yl)-2',4',6'-trioxo-6,7,8,8a-tetrahydro-1H-spiro[naphthalene-2,5'-pyrimidine]-4-carbonitrile (C<sub>26</sub>H<sub>24</sub>N<sub>4</sub>O<sub>3</sub>, 4o)**

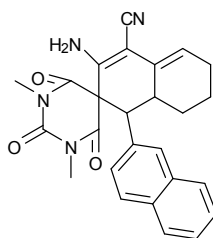

White solid; Yield: 88%; M.p. (°C): 267-269; IR (CHCl<sub>3</sub>)  $\nu_{\max}/\text{cm}^{-1}$ : 2210, 1676, 1449, 1367; <sup>1</sup>H NMR (400 MHz, DMSO-*d*<sub>6</sub>)  $\delta_H$ : 7.93-7.90 (m, 1H, Ar-H), 7.85 (d, 1H,  $J=8.39$  Hz, Ar-H), 7.78 (d, 1H,  $J=7.63$  Hz, Ar-H), 7.52-7.45 (m, 3H, Ar-H), 7.14 (d, 1H,  $J=6.87$  Hz, Ar-H), 6.53 (s, 2H, -NH<sub>2</sub>), 5.65 (s, 1H, vinylic), 4.04 (d, 1H,  $J=12.21$  Hz, -CH), 3.10-3.04 (m, 1H, -CH), 2.88 (s, 3H, -CH<sub>3</sub>), 2.18-2.15 (m, 1H, -CH<sub>2</sub>), 2.14 (s, 3H, -CH<sub>3</sub>), 2.07-1.99 (m, 1H, -CH<sub>2</sub>), 1.59-1.56 (m, 1H, -CH<sub>2</sub>), 1.37-1.35 (m, 2H, -CH<sub>2</sub>), 0.77-0.68 (m, 1H, -CH<sub>2</sub>); <sup>13</sup>C NMR (100 MHz, DMSO-*d*<sub>6</sub>)  $\delta_C$ : 168.3, 167.3, 151.3, 149.3, 133.1, 131.0, 128.9, 128.5, 126.4, 125.7, 124.8, 124.5, 121.9, 117.8, 117.4, 82.2, 60.7, 48.2, 33.4, 28.0, 27.6, 27.0, 24.9, 21.5; LCMS (ESI)  $m/z$  calcd. for C<sub>26</sub>H<sub>24</sub>N<sub>4</sub>O<sub>3</sub>: 440.1851 [M<sup>+</sup>]; found: 441.1923 [M+H]<sup>+</sup>.

**3-amino-1',3'-dimethyl-2',4',6'-trioxo-1-(pyridin-2-yl)-2',3',4',6,6',7,8,8a-octahydro-1H,1'H-spiro[naphthalene-2,5'-pyrimidine]-4-carbonitrile (C<sub>21</sub>H<sub>21</sub>N<sub>5</sub>O<sub>3</sub>, 4p)**

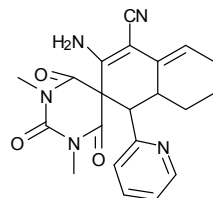

White solid; Yield: 87%; M.p. (°C): 253-255; IR (CHCl<sub>3</sub>)  $\nu_{\max}/\text{cm}^{-1}$ : 2187, 1682, 1441, 1367; <sup>1</sup>H NMR (400 MHz, DMSO-*d*<sub>6</sub>)  $\delta_{\text{H}}$ : 8.48 (s, 1H, Ar-H), 7.70 (s, 1H, Ar-H), 7.27 (s, 1H, Ar-H), 7.04 (s, 1H, Ar-H), 6.50 (s, 2H, -NH<sub>2</sub>), 5.56 (s, 1H, vinylic), 3.35 (m, 2H, -CH), 2.96 (s, 3H, -CH<sub>3</sub>), 2.78 (s, 3H, -CH<sub>3</sub>), 2.10 (s, 2H, -CH<sub>2</sub>), 1.62 (s, 1H, -CH<sub>2</sub>), 1.32 (s, 1H, -CH<sub>2</sub>), 1.04 (s, 1H, -CH<sub>2</sub>), 0.84 (s, 1H, -CH<sub>2</sub>); <sup>13</sup>C NMR (100 MHz, DMSO-*d*<sub>6</sub>)  $\delta_{\text{C}}$ : 168.6, 166.4, 155.3, 151.6, 149.9, 149.0, 136.8, 131.2, 124.4, 123.3, 117.8, 116.7, 81.9, 59.9, 57.5, 32.62, 28.3, 28.0, 26.9, 24.8, 21.6; LCMS (ESI) *m/z* calcd. for C<sub>21</sub>H<sub>21</sub>N<sub>5</sub>O<sub>3</sub>: 391.1635 [M<sup>+</sup>]; found: 392.1713 [M+H]<sup>+</sup>.

**3-amino-1',3'-dimethyl-2',4',6'-trioxo-1-(3,4,5-trimethoxyphenyl)-2',3',4',6,6',7,8,8a-octahydro-1*H*,1'*H*-spiro[naphthalene-2,5'-pyrimidine]-4-carbonitrile (C<sub>25</sub>H<sub>28</sub>N<sub>4</sub>O<sub>6</sub>, 4q)**

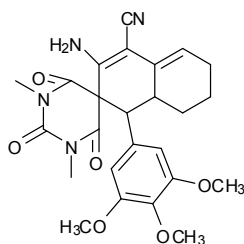

White solid; Yield: 92%; M.p. (°C): 286-288; IR (CHCl<sub>3</sub>)  $\nu_{\max}/\text{cm}^{-1}$ : 2180, 1682, 1434, 1376; <sup>1</sup>H NMR (400 MHz, DMSO-*d*<sub>6</sub>)  $\delta_{\text{H}}$ : 6.47 (s, 2H, Ar-H), 6.13 (s, 2H, -NH<sub>2</sub>), 5.57 (s, 1H, vinylic), 3.66 (s, 3H, -OCH<sub>3</sub>), 3.64 (s, 3H, -OCH<sub>3</sub>), 3.56 (s, 3H, -OCH<sub>3</sub>), 3.35 (m, 1H, -CH), 2.97-2.95 (m, 1H, -CH), 2.91 (s, 3H, -CH<sub>3</sub>), 2.90 (s, 3H, -CH<sub>3</sub>), 2.15-2.11 (m, 1H, -CH<sub>2</sub>), 2.05-1.98 (m, 1H, -CH<sub>2</sub>), 1.65-1.62 (m, 1H, -CH<sub>2</sub>), 1.46-1.39 (m, 2H, -CH<sub>2</sub>), 0.79-0.71 (m, 1H, -CH<sub>2</sub>); <sup>13</sup>C NMR (100 MHz, DMSO-*d*<sub>6</sub>)  $\delta_{\text{C}}$ : 168.8, 167.1, 153.0, 152.4, 151.1, 149.8, 137.2, 130.8, 130.6, 117.8, 117.3, 107.8, 102.6, 82.1, 60.84, 60.1, 56.1, 56.0, 55.8, 32.3, 30.7, 28.3, 27.3, 24.9, 21.5; LCMS (ESI) *m/z* calcd. for C<sub>25</sub>H<sub>28</sub>N<sub>4</sub>O<sub>6</sub>: 480.2004 [M<sup>+</sup>]; found: 481.2077 [M+H]<sup>+</sup>.



Figure 3: DEPT spectrum of compound 4a.

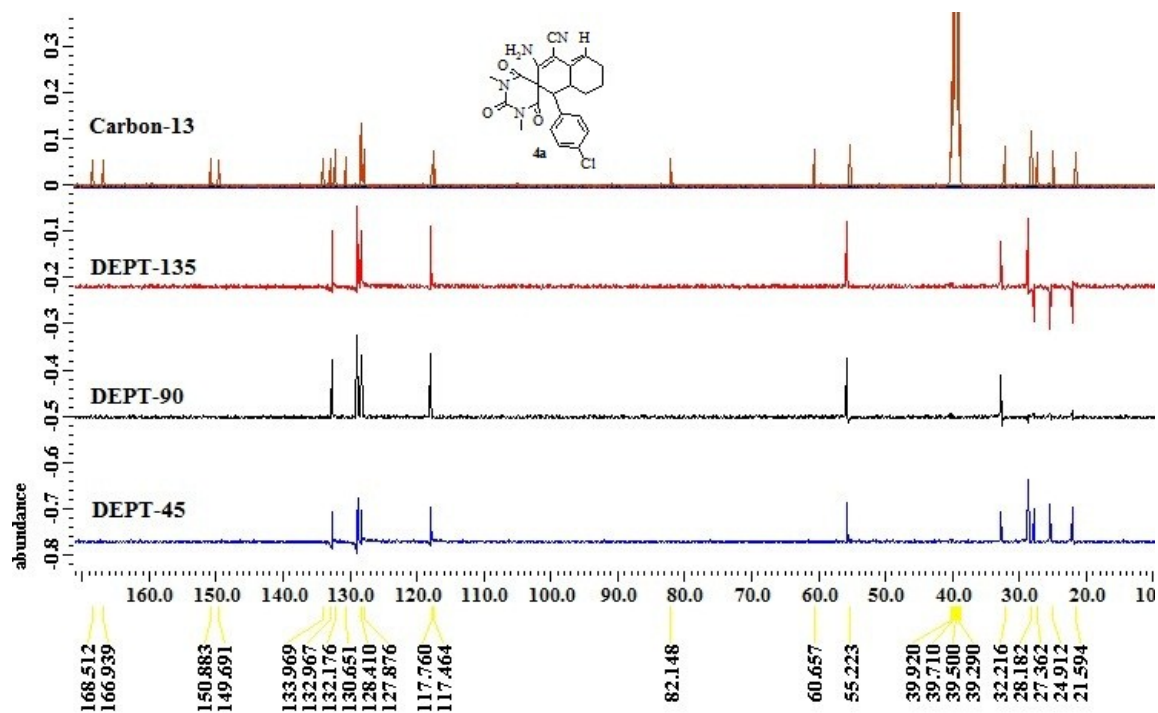

Figure 4: Mass spectrum of compound 4a.

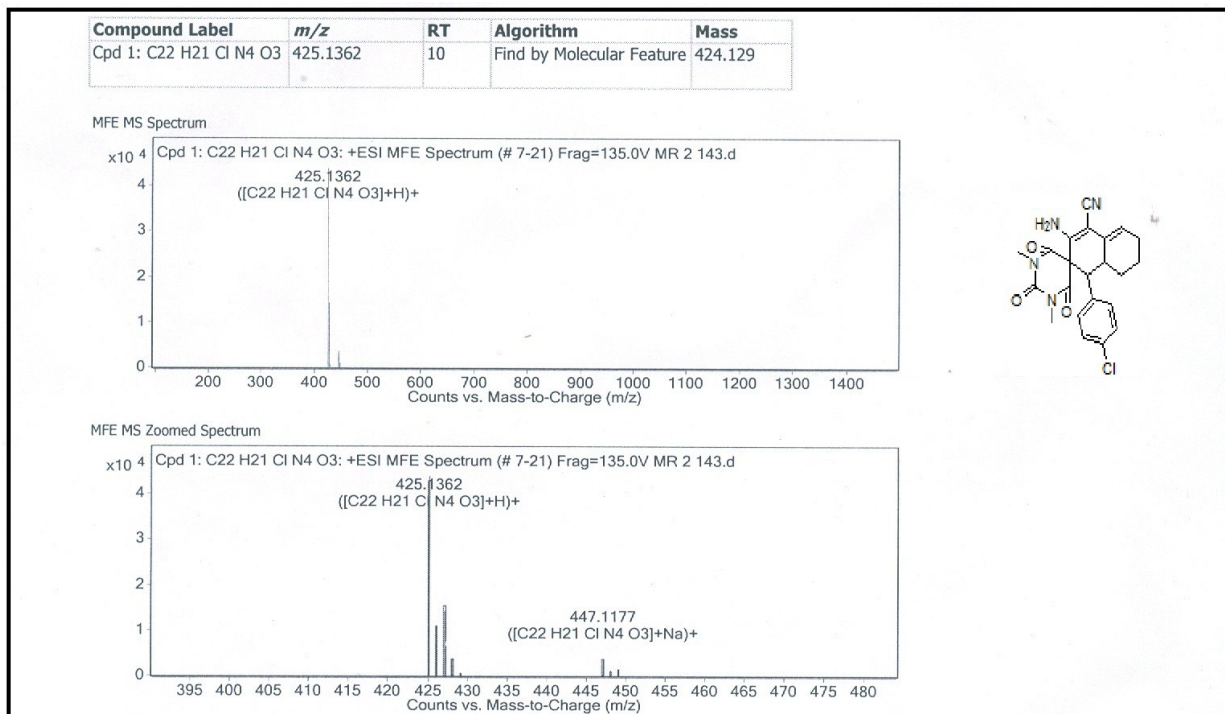

Figure 5: <sup>1</sup>H NMR spectrum of compound **4b** in DMSO.

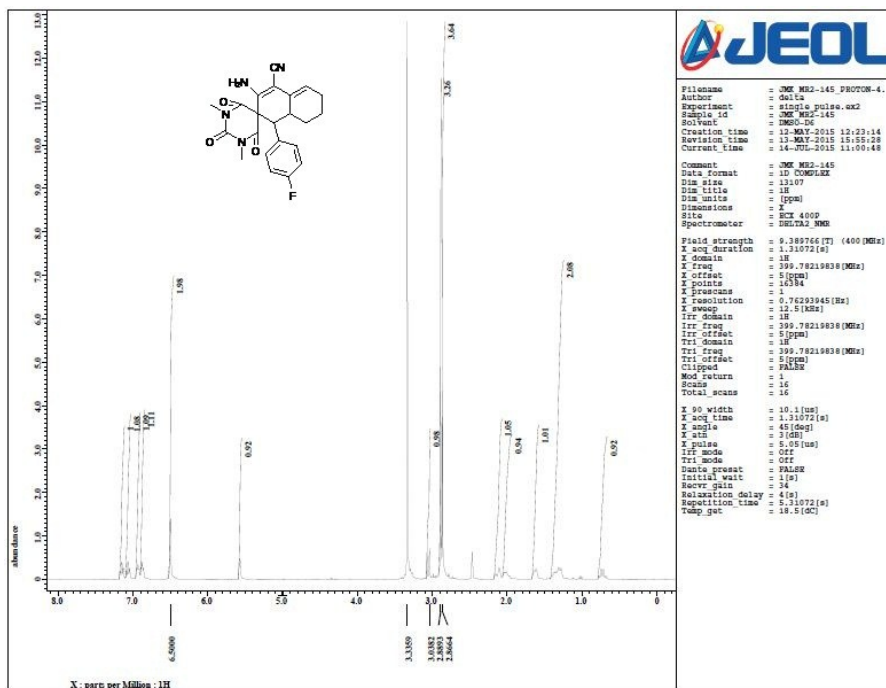

Figure 6: <sup>13</sup>C NMR spectrum of compound **4b** in DMSO.

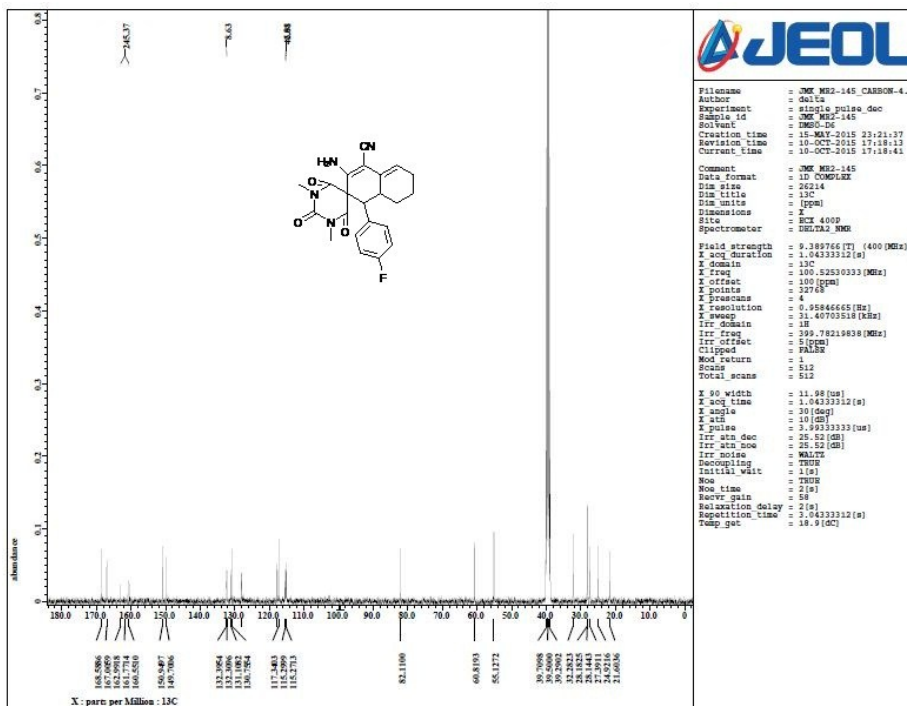

Figure 7: Mass spectrum of compound 4b.

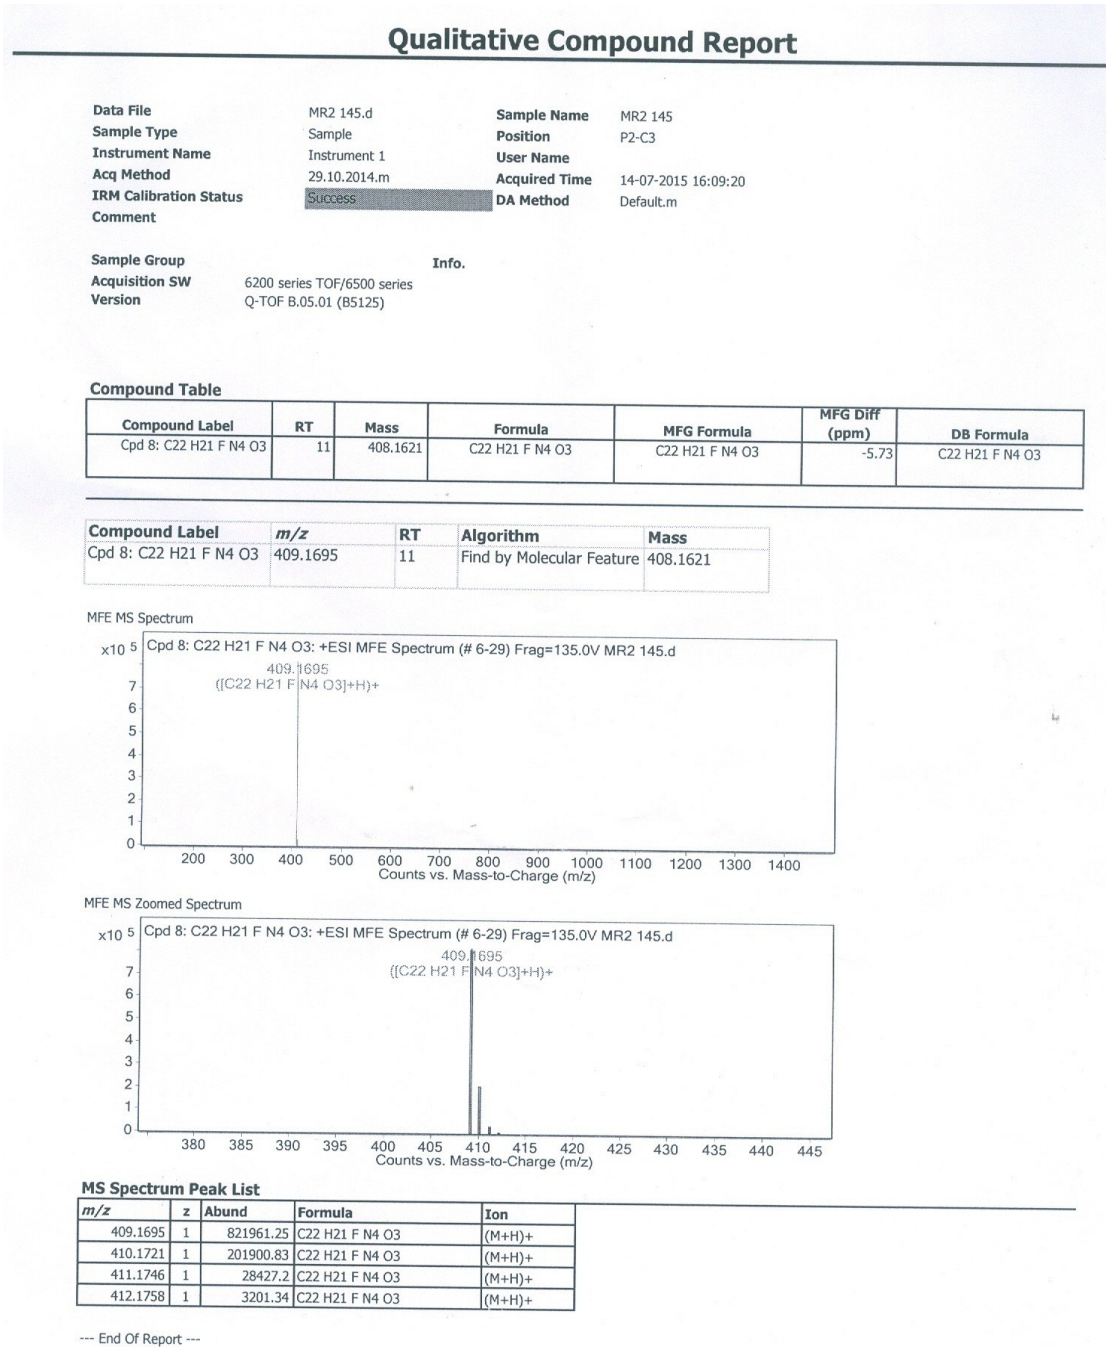

Figure 8: <sup>1</sup>H NMR spectrum of compound 4c in DMSO.

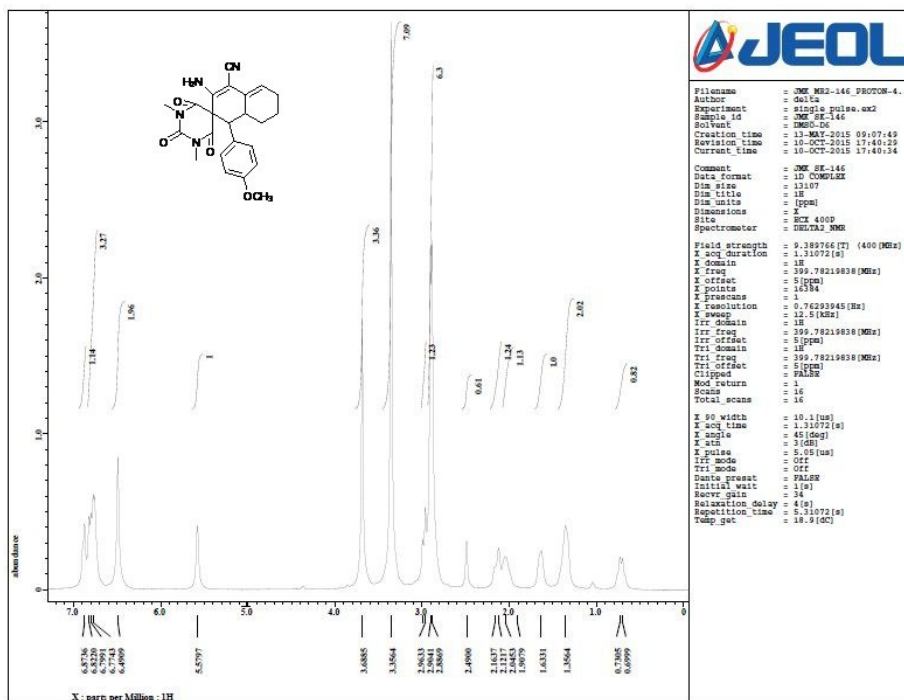

Figure 9: <sup>13</sup>C NMR spectrum of compound 4c in DMSO.

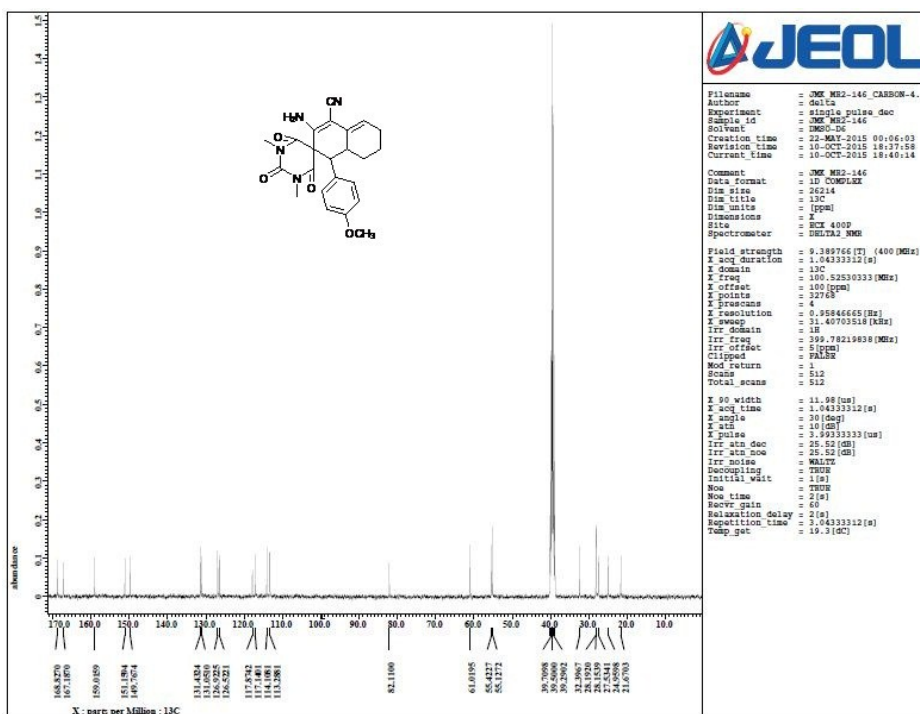

**Figure 10: Mass spectrum of compound 4c.**

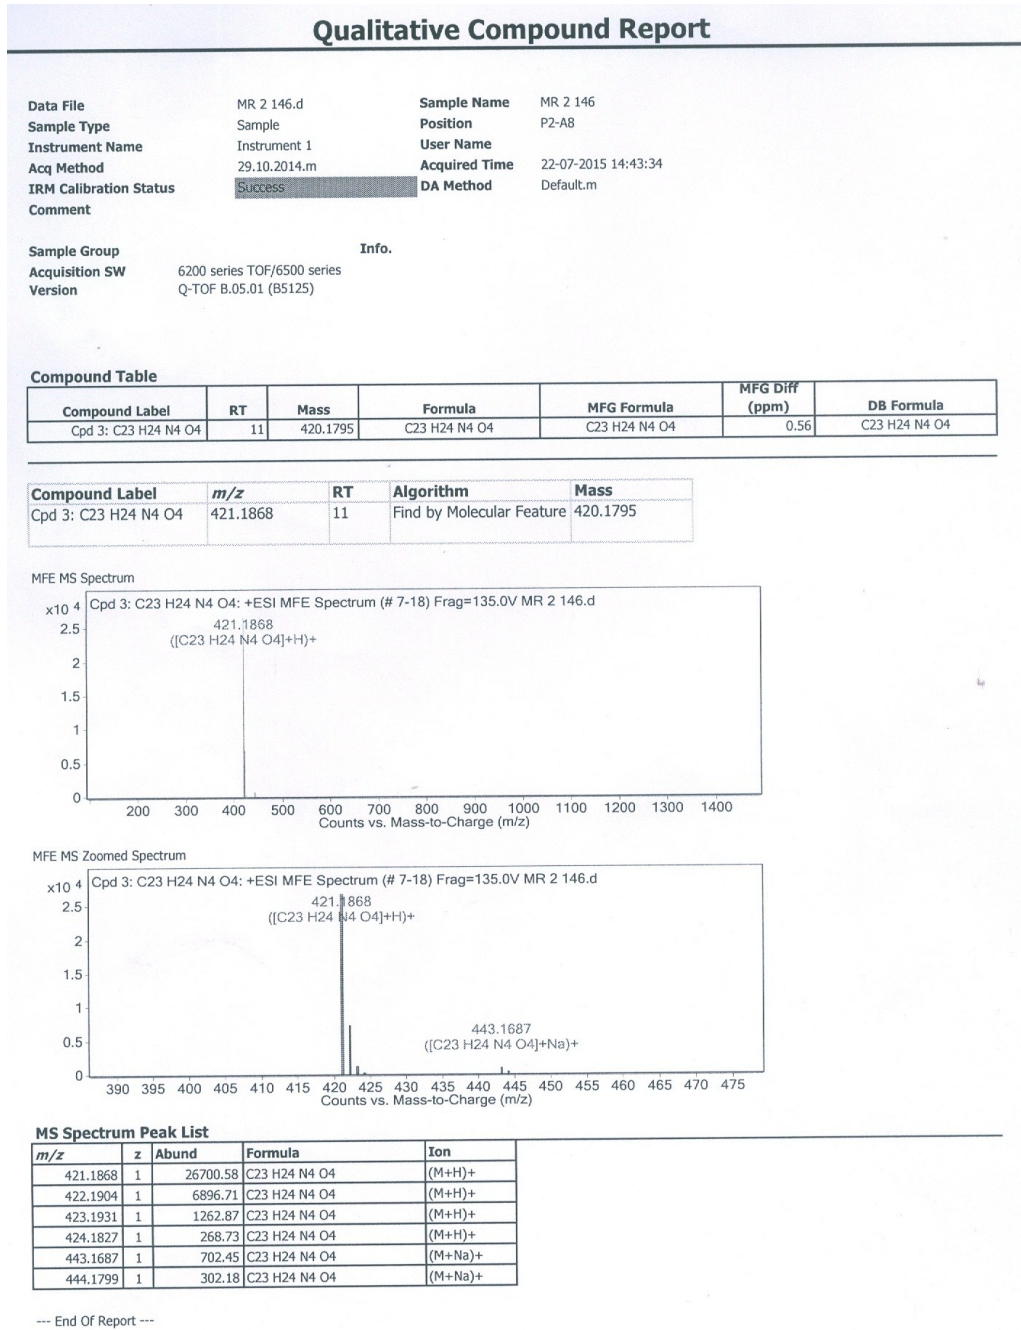



Figure 11: <sup>1</sup>H NMR spectrum of compound 4d in DMSO.

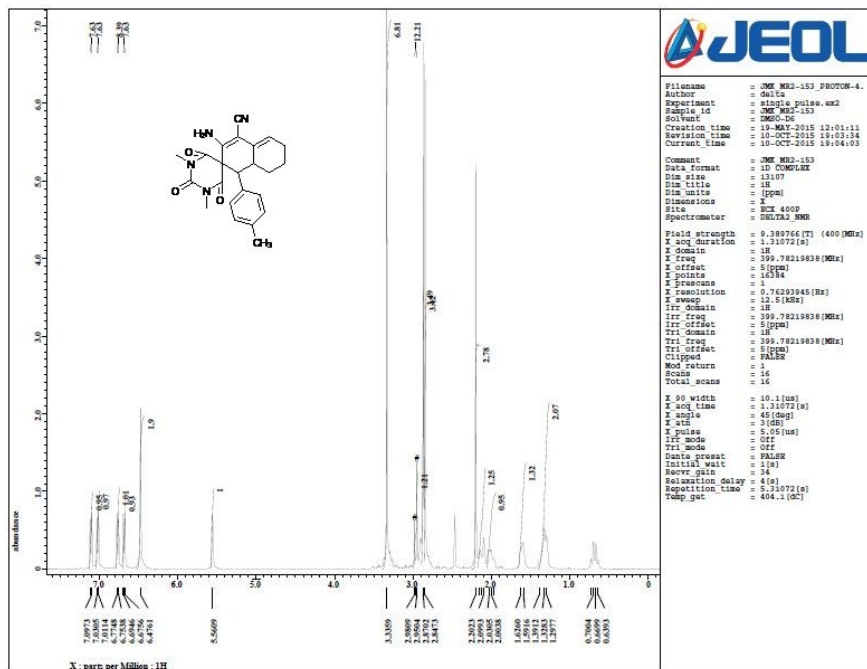

Figure 12: <sup>13</sup>C NMR spectrum of compound 4d in DMSO.

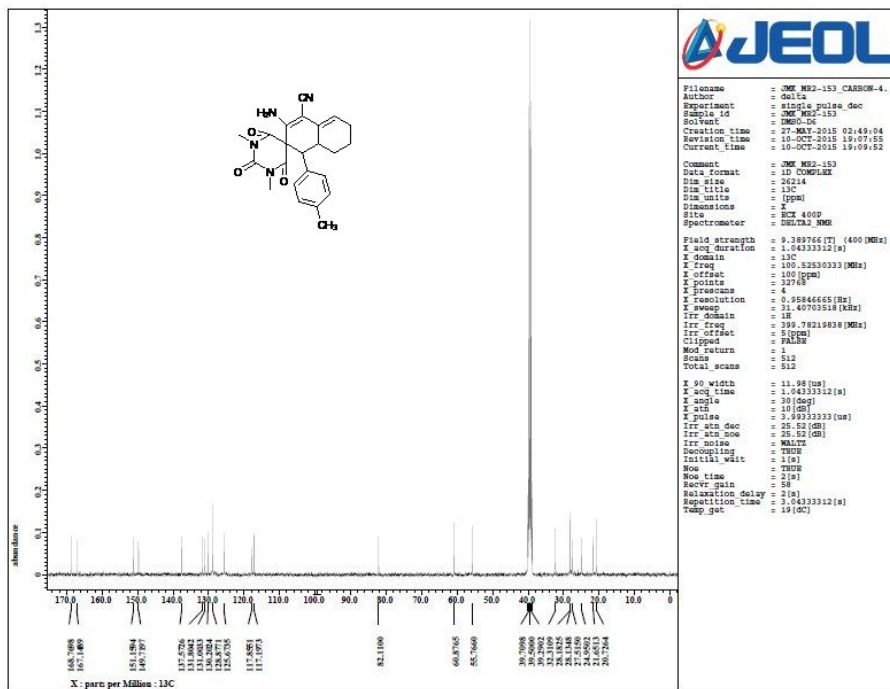

Figure 13: Mass spectrum of compound 4d.

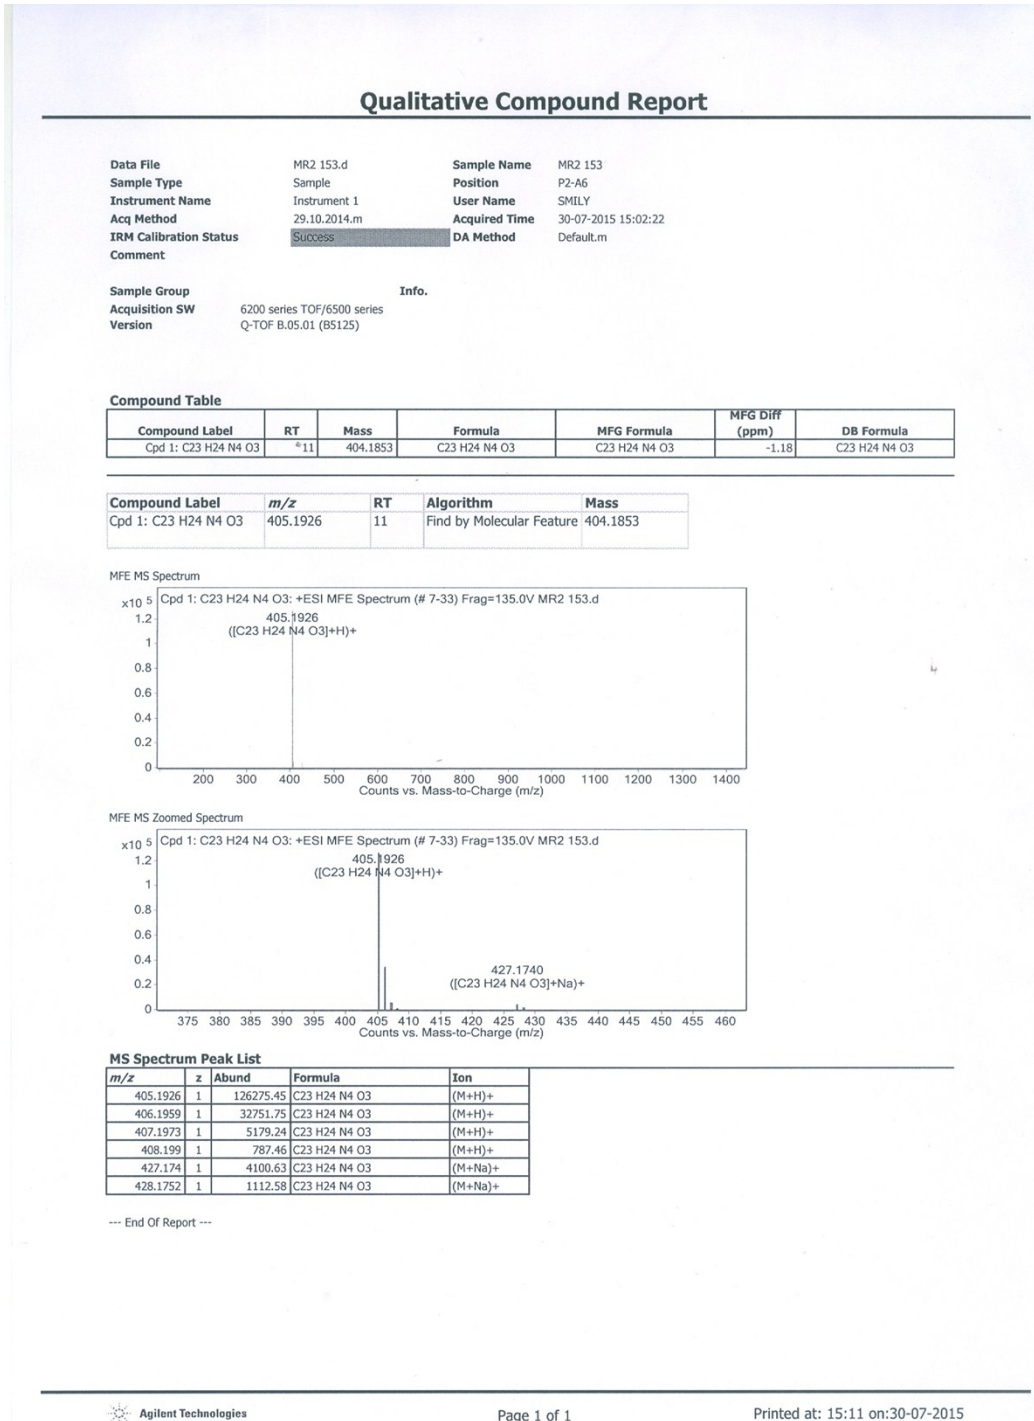



Figure 16: Mass spectrum of compound 4e.

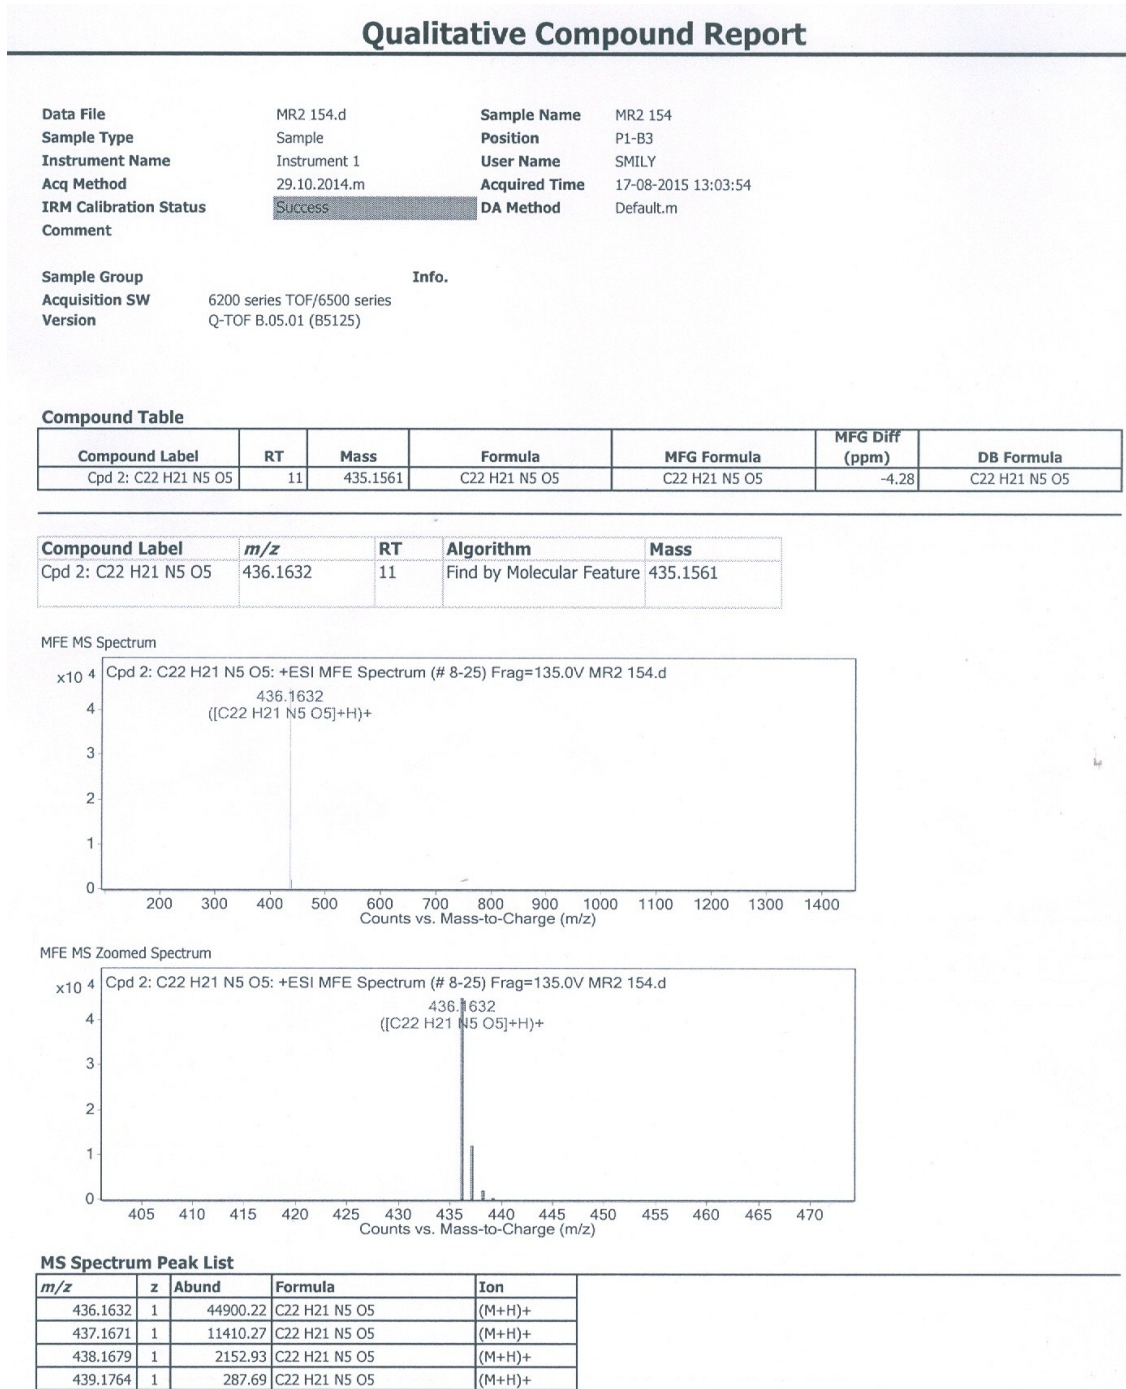

--- End Of Report ---

Figure 17:  $^1\text{H}$  NMR spectrum of compound **4f** in DMSO.

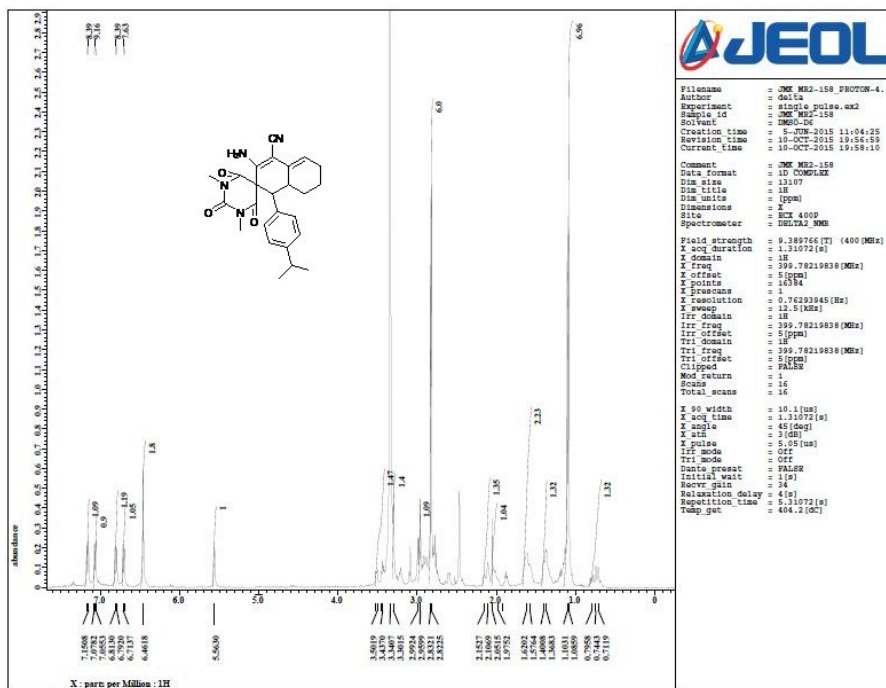

Figure 18:  $^{13}\text{C}$  NMR spectrum of compound **4f** in DMSO.

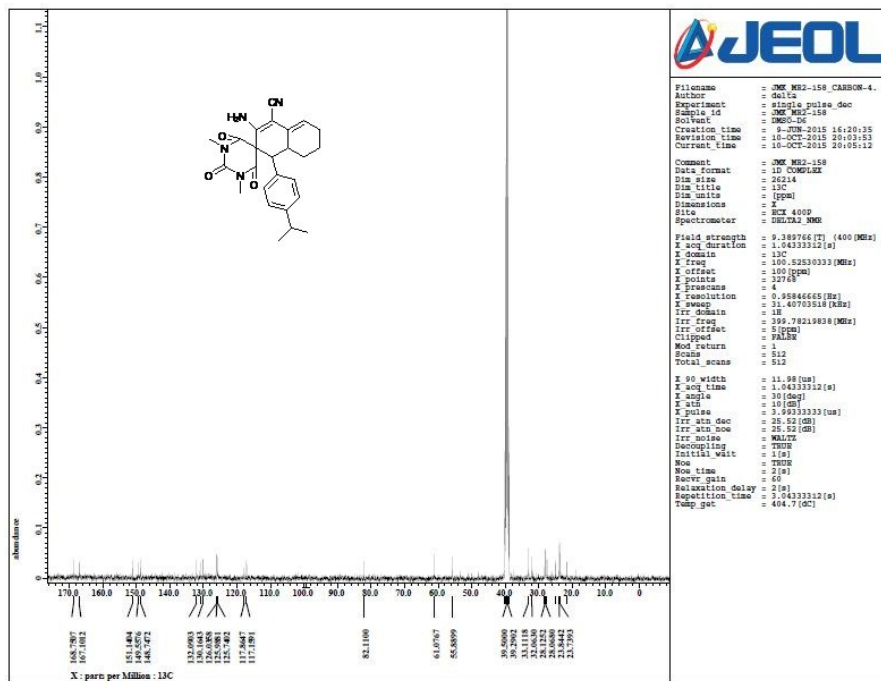

Figure 19: Mass spectrum of compound 4f.

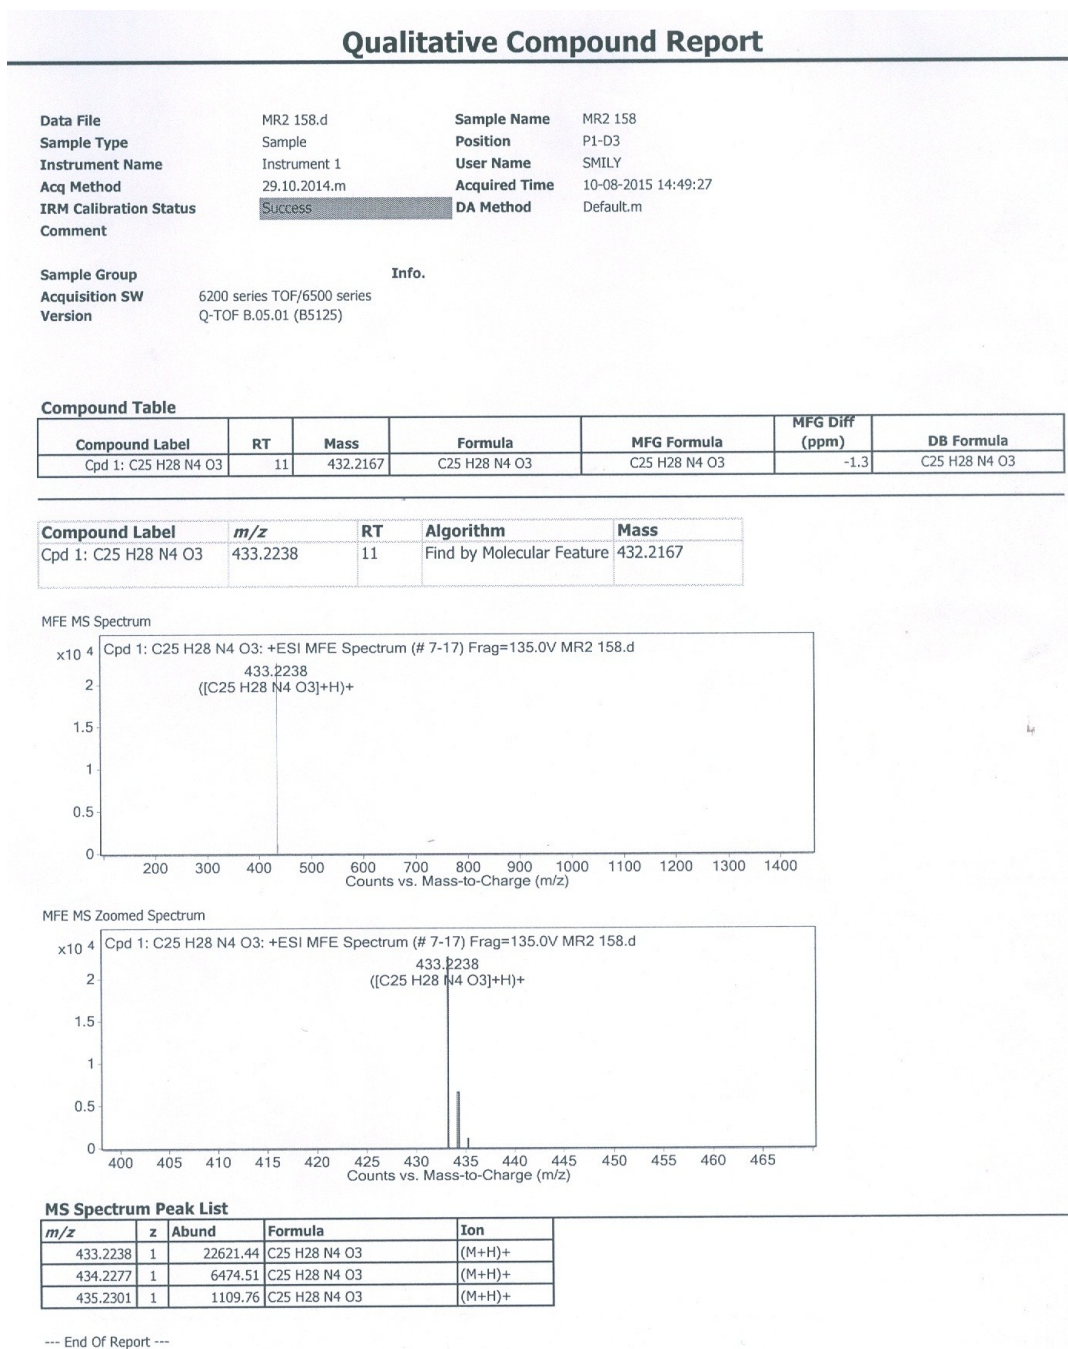



Figure 22: Mass spectrum of compound 4g.

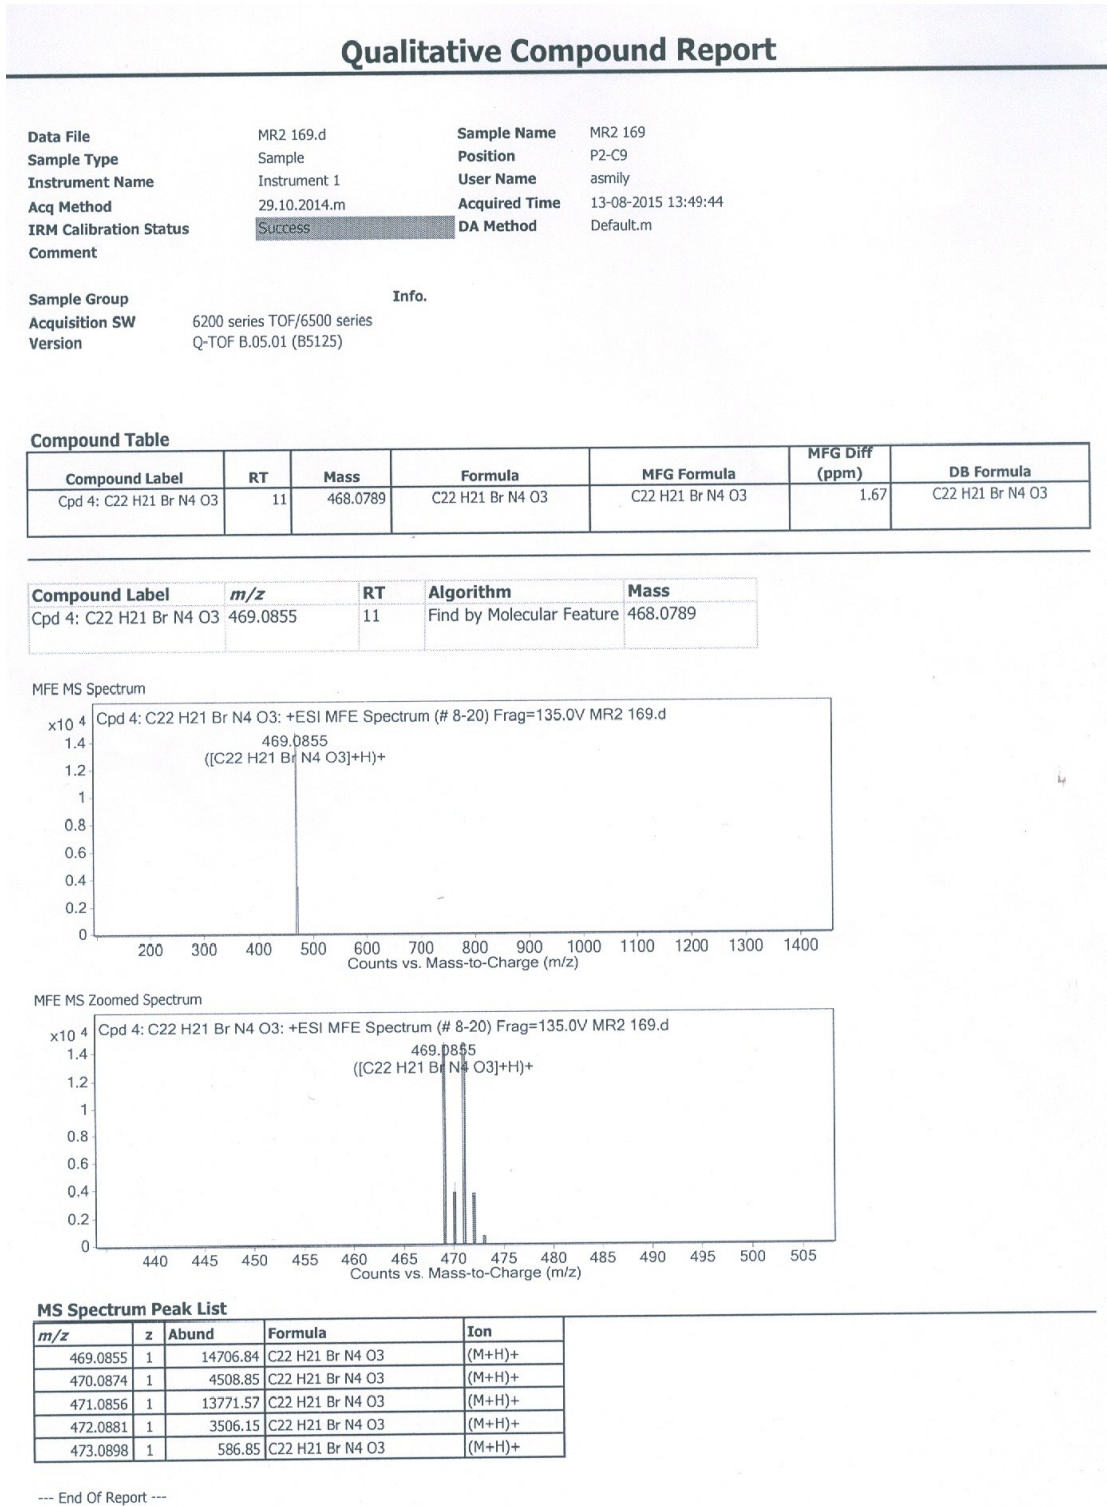



Figure 23: <sup>1</sup>H NMR spectrum of compound 4h in DMSO.

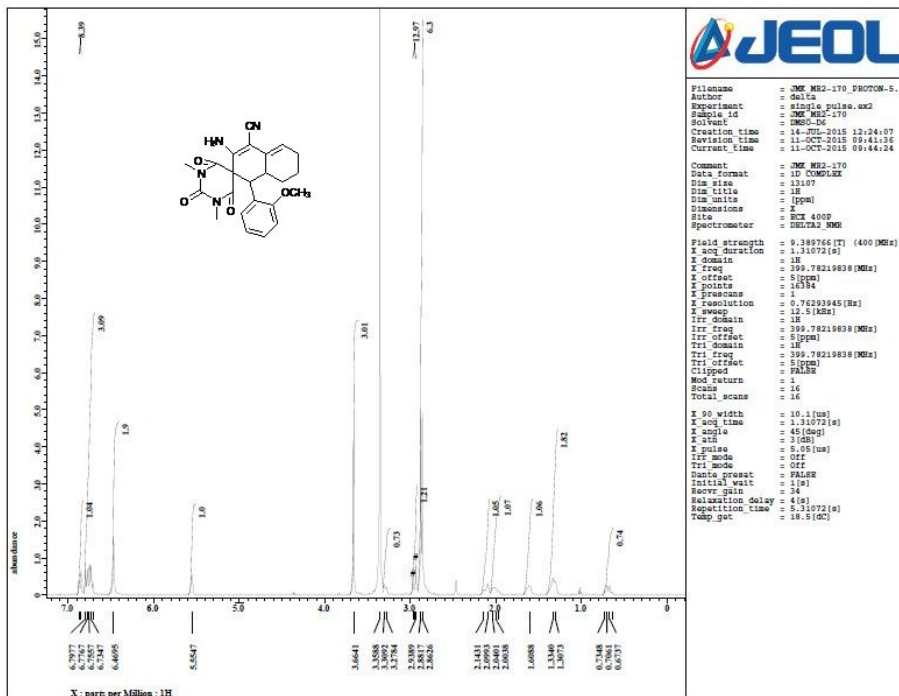

Figure 24: <sup>13</sup>C NMR spectrum of compound 4h in DMSO.

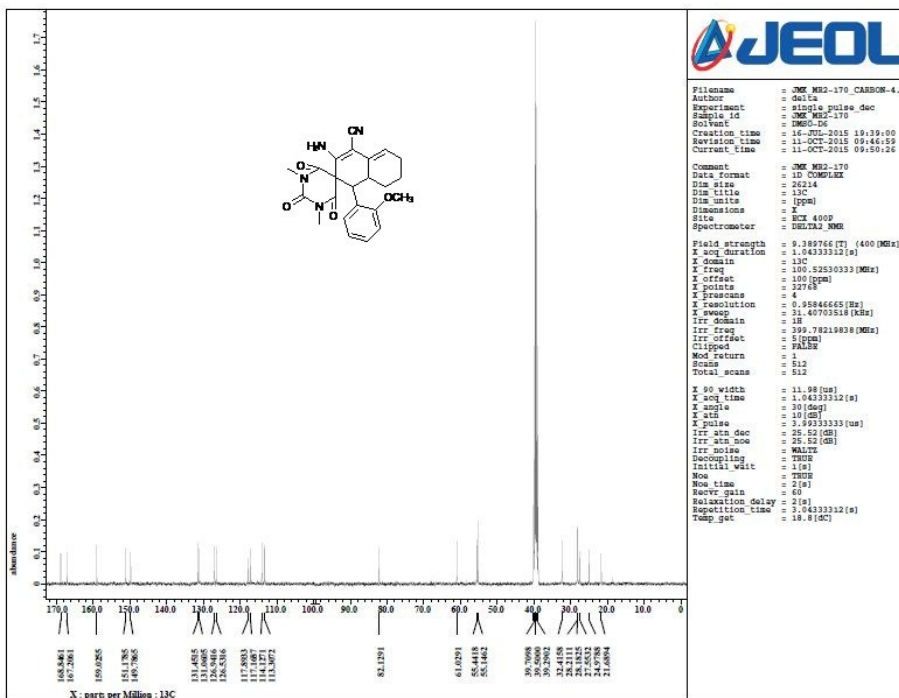

Figure 25: Mass spectrum of compound 4h.

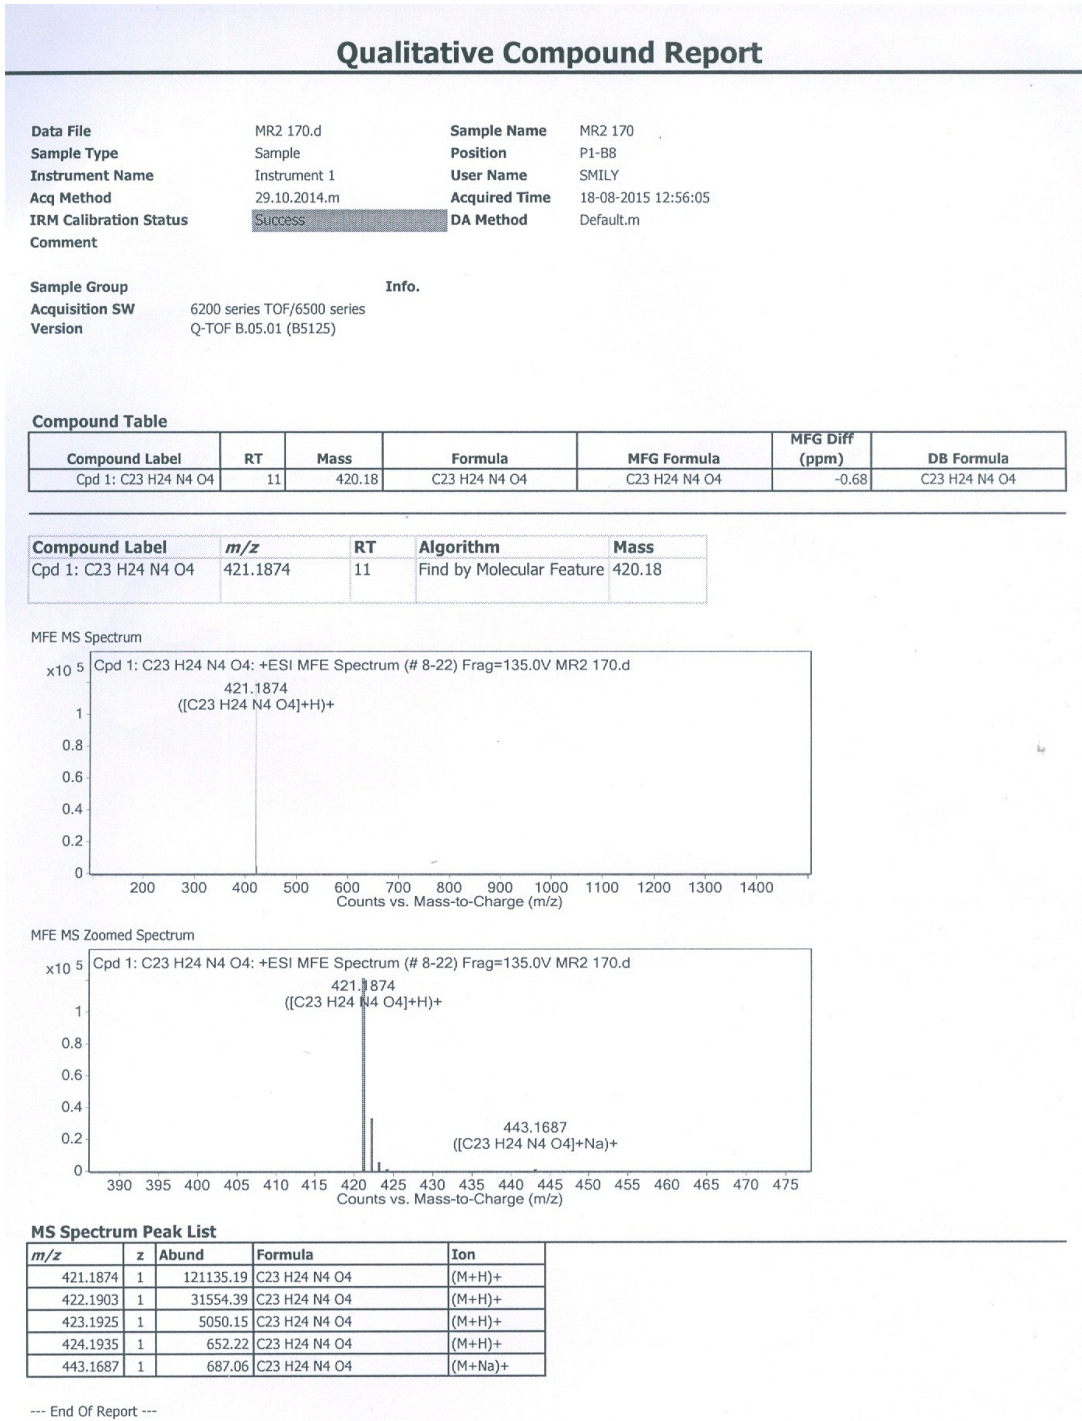

Figure 26: <sup>1</sup>H NMR spectrum of compound 4i in DMSO.

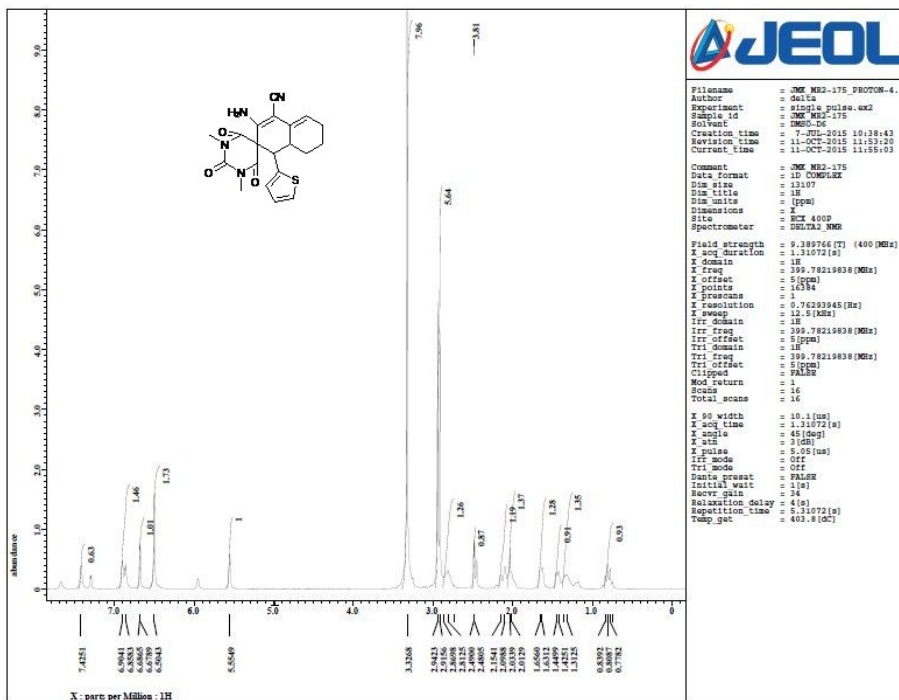

Figure 27: <sup>13</sup>C NMR spectrum of compound 4i in DMSO.

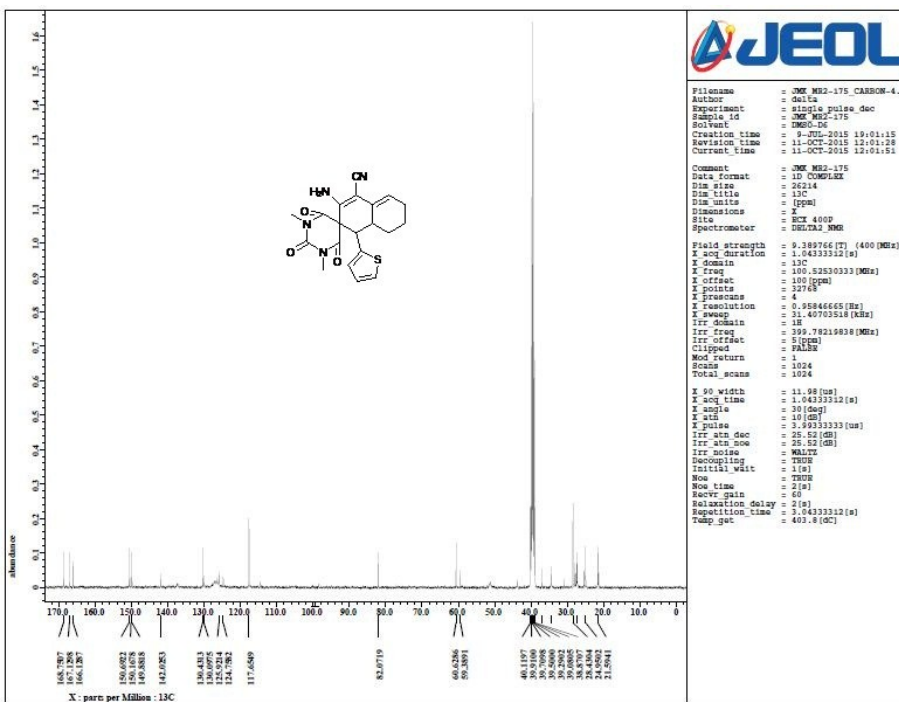

Figure 28: Mass spectrum of compound 4i.

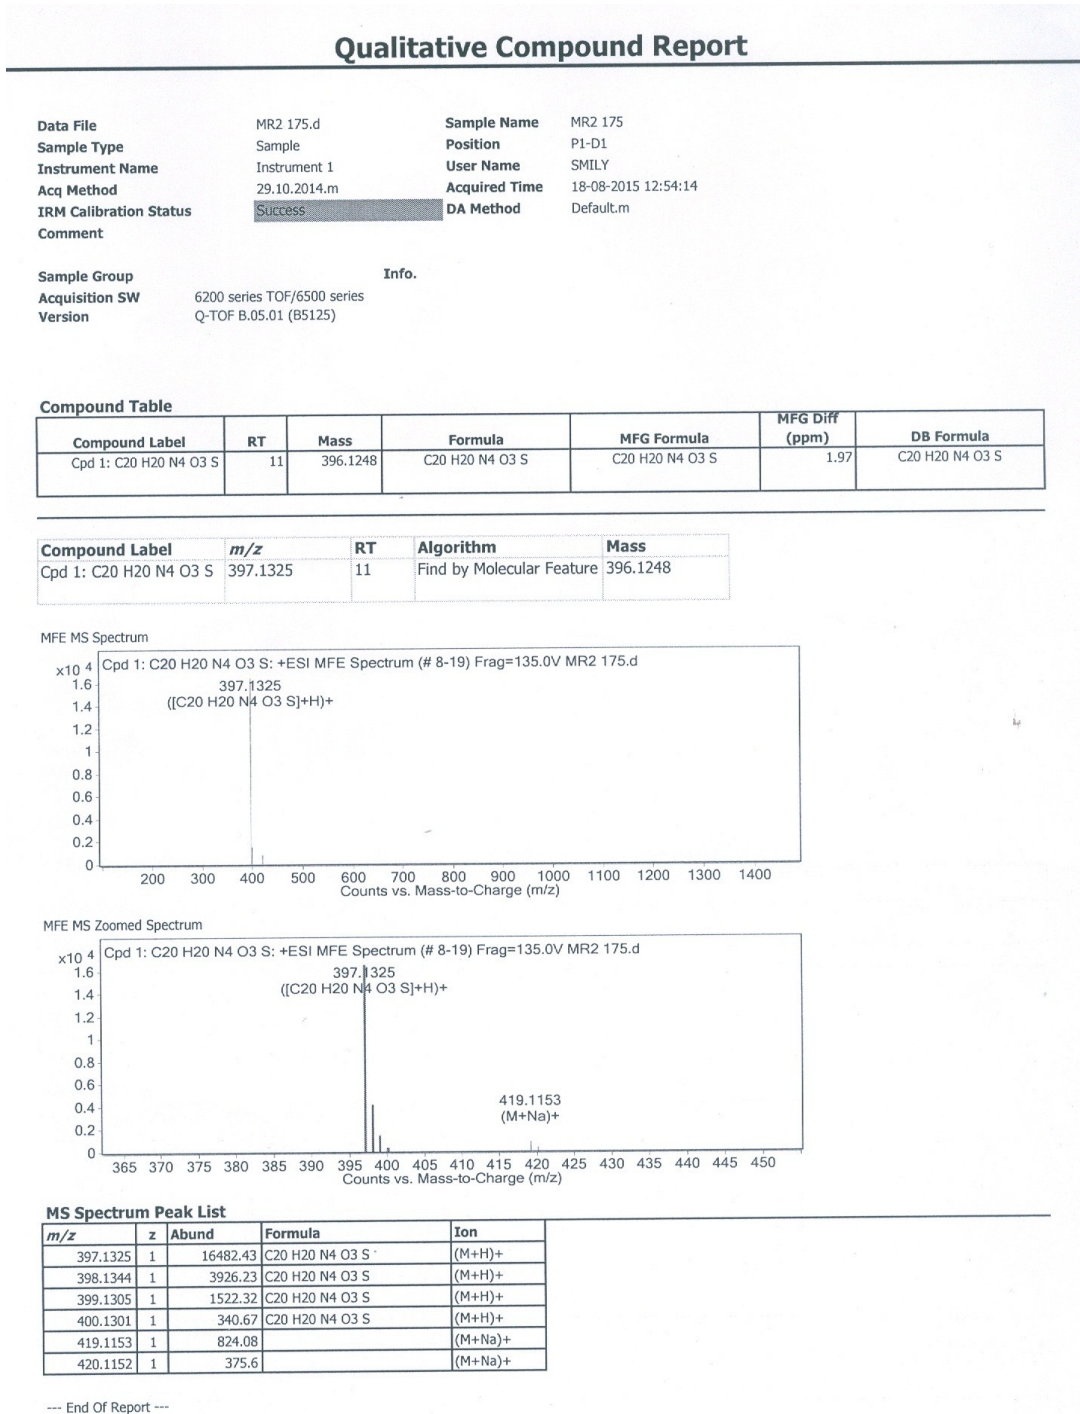

Figure 29:  $^1\text{H}$  NMR spectrum of compound **4j** in DMSO.

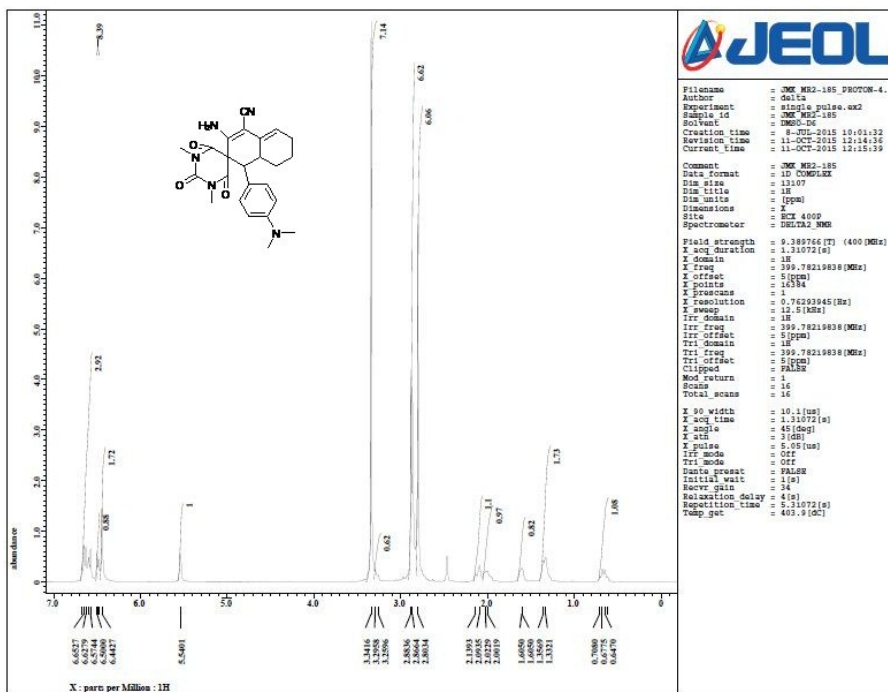

Figure 30:  $^{13}\text{C}$  NMR spectrum of compound **4j** in DMSO.

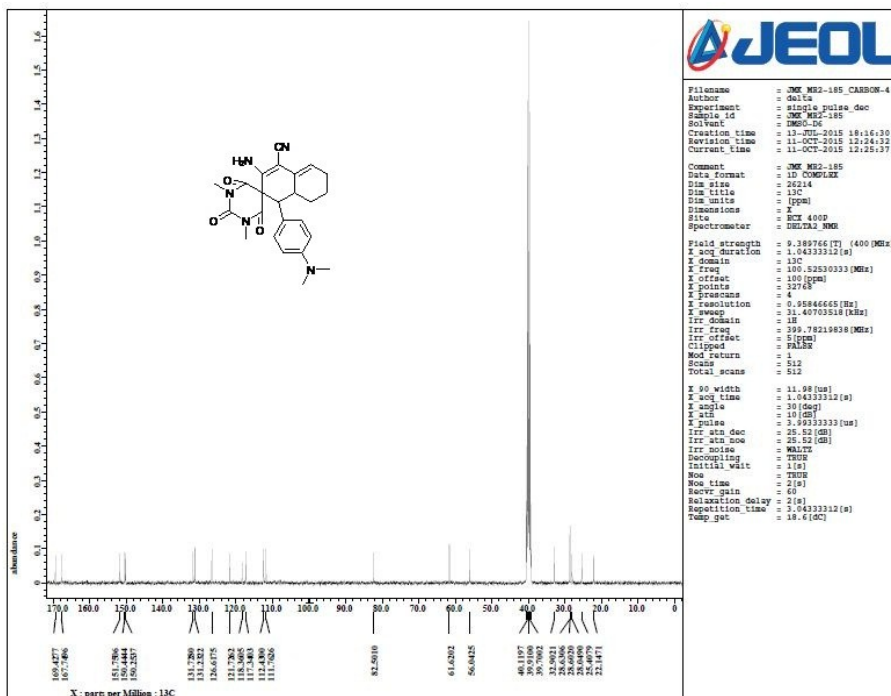

Figure 31: Mass spectrum of compound 4j.

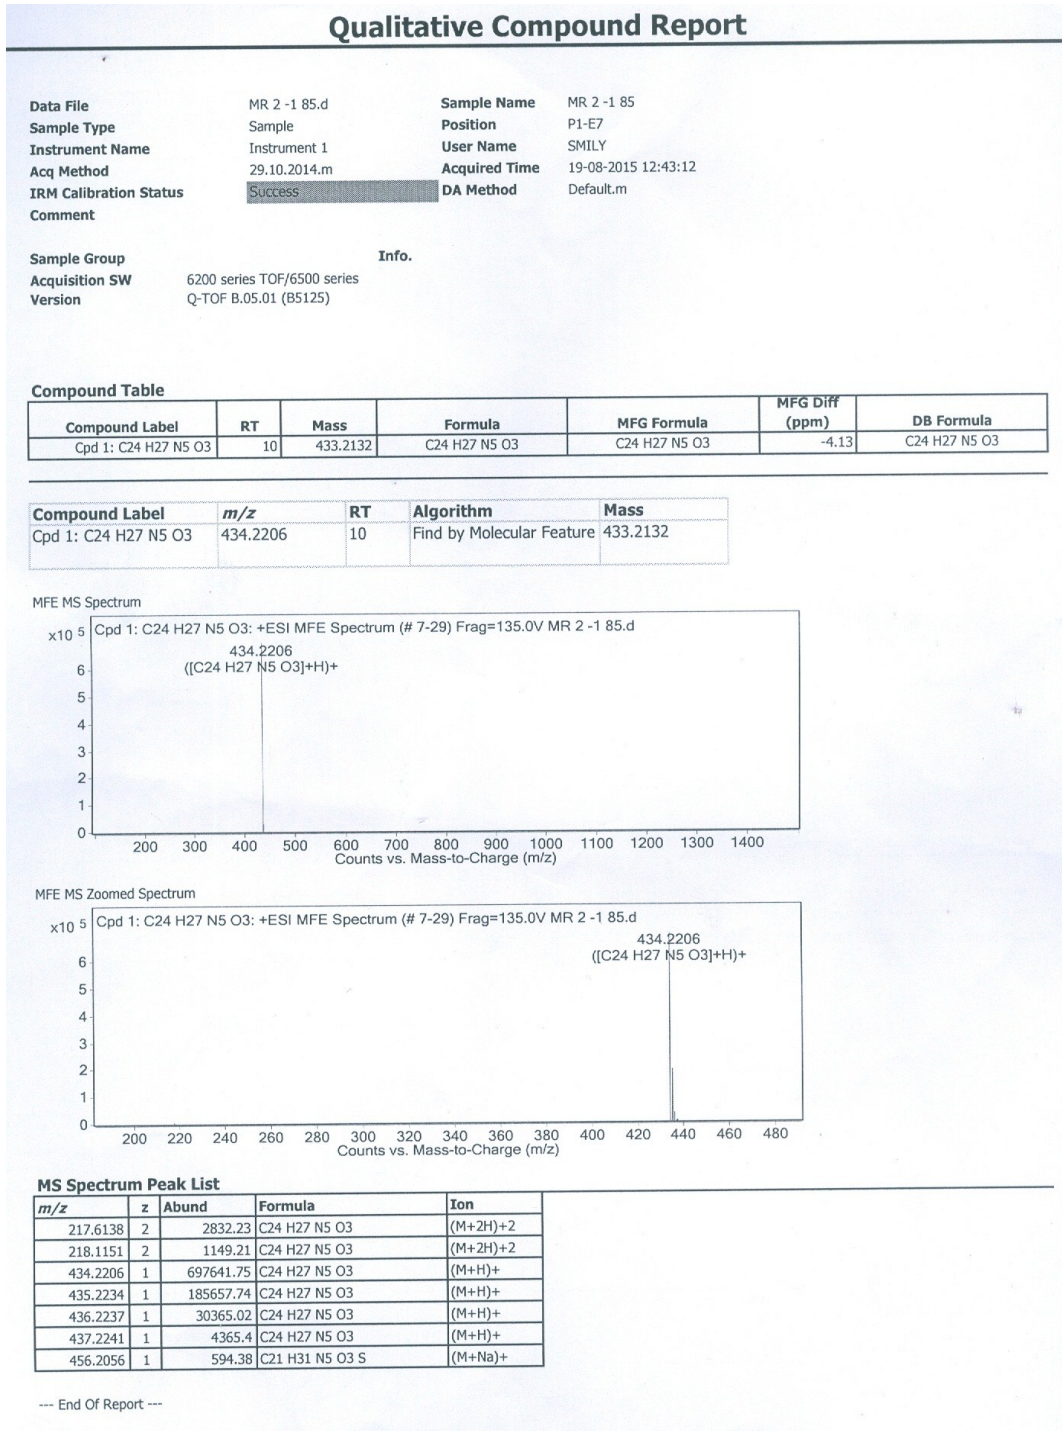



Figure 34: Mass spectrum of compound 4k.

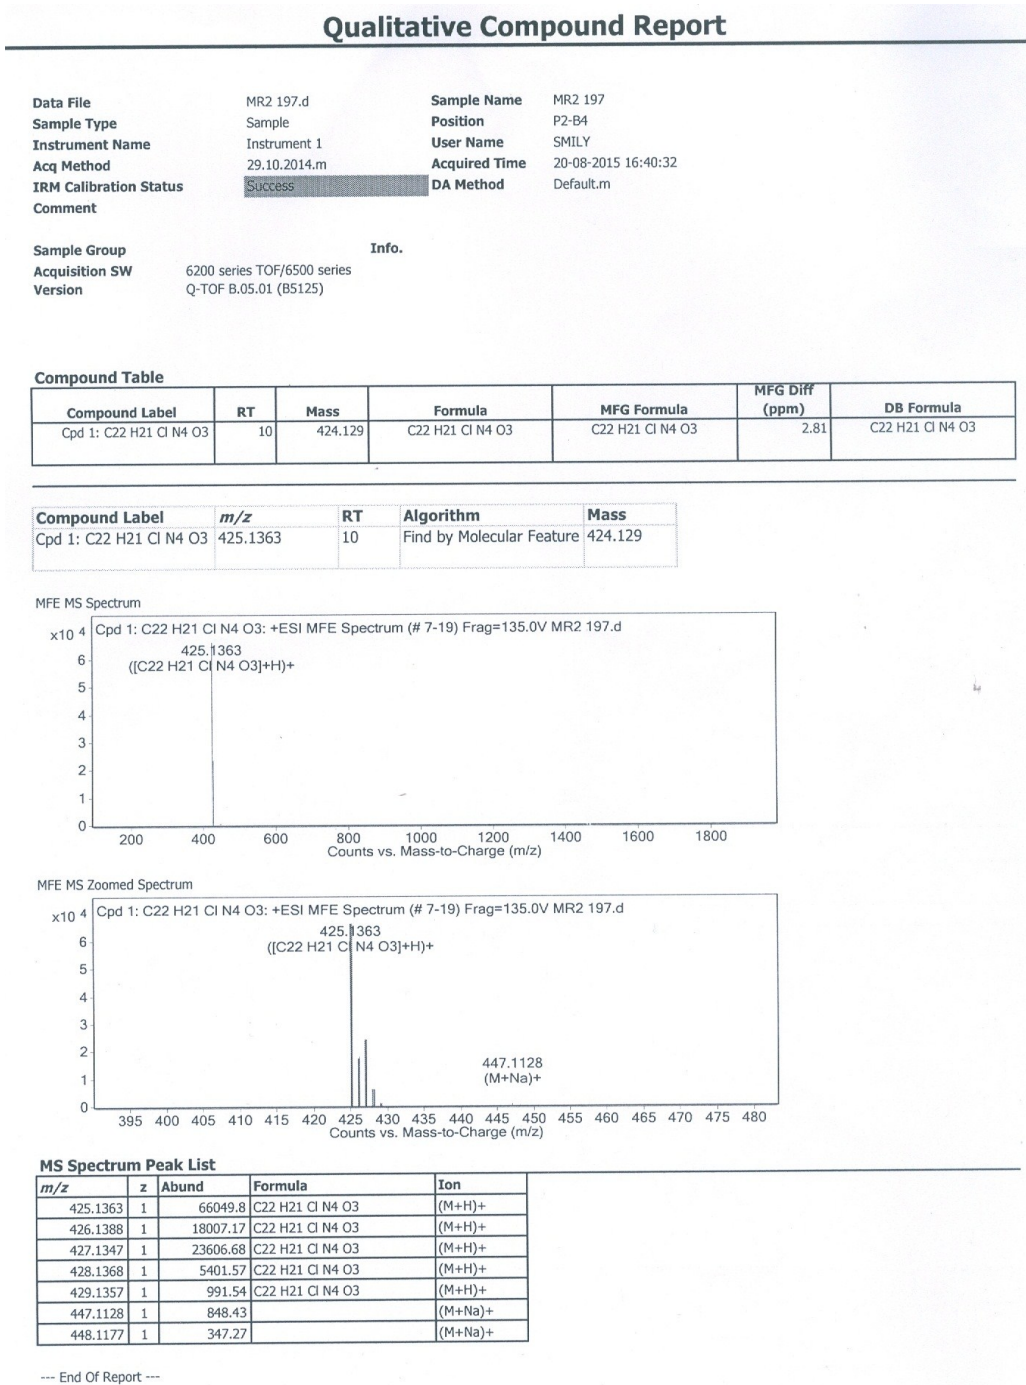



Figure 35: <sup>1</sup>H NMR spectrum of compound 4I in DMSO.

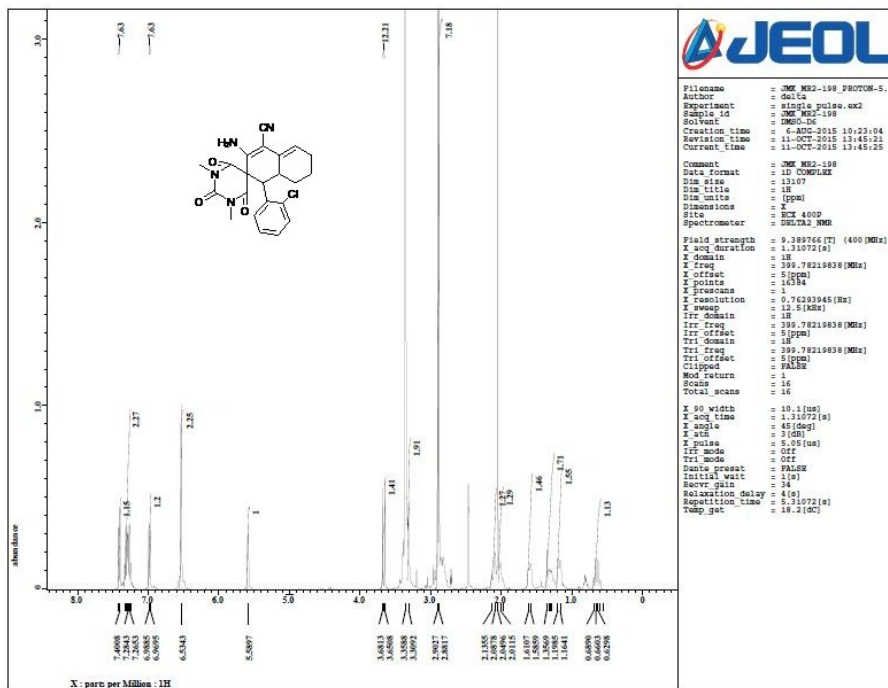

Figure 36: <sup>13</sup>C NMR spectrum of compound 4I in DMSO.

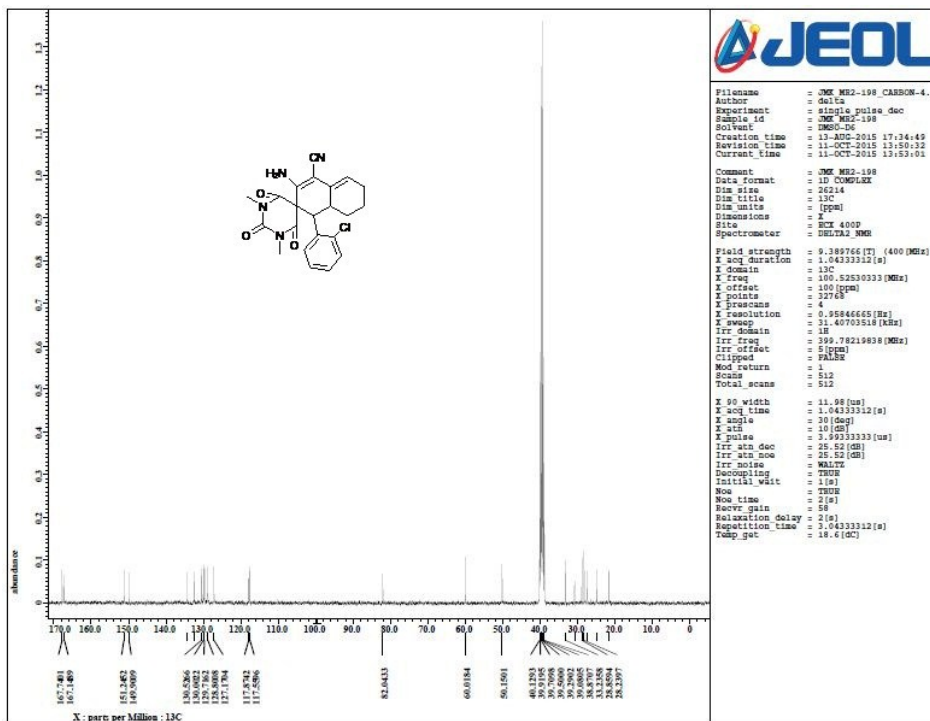

Figure 37: Mass spectrum of compound 4I.

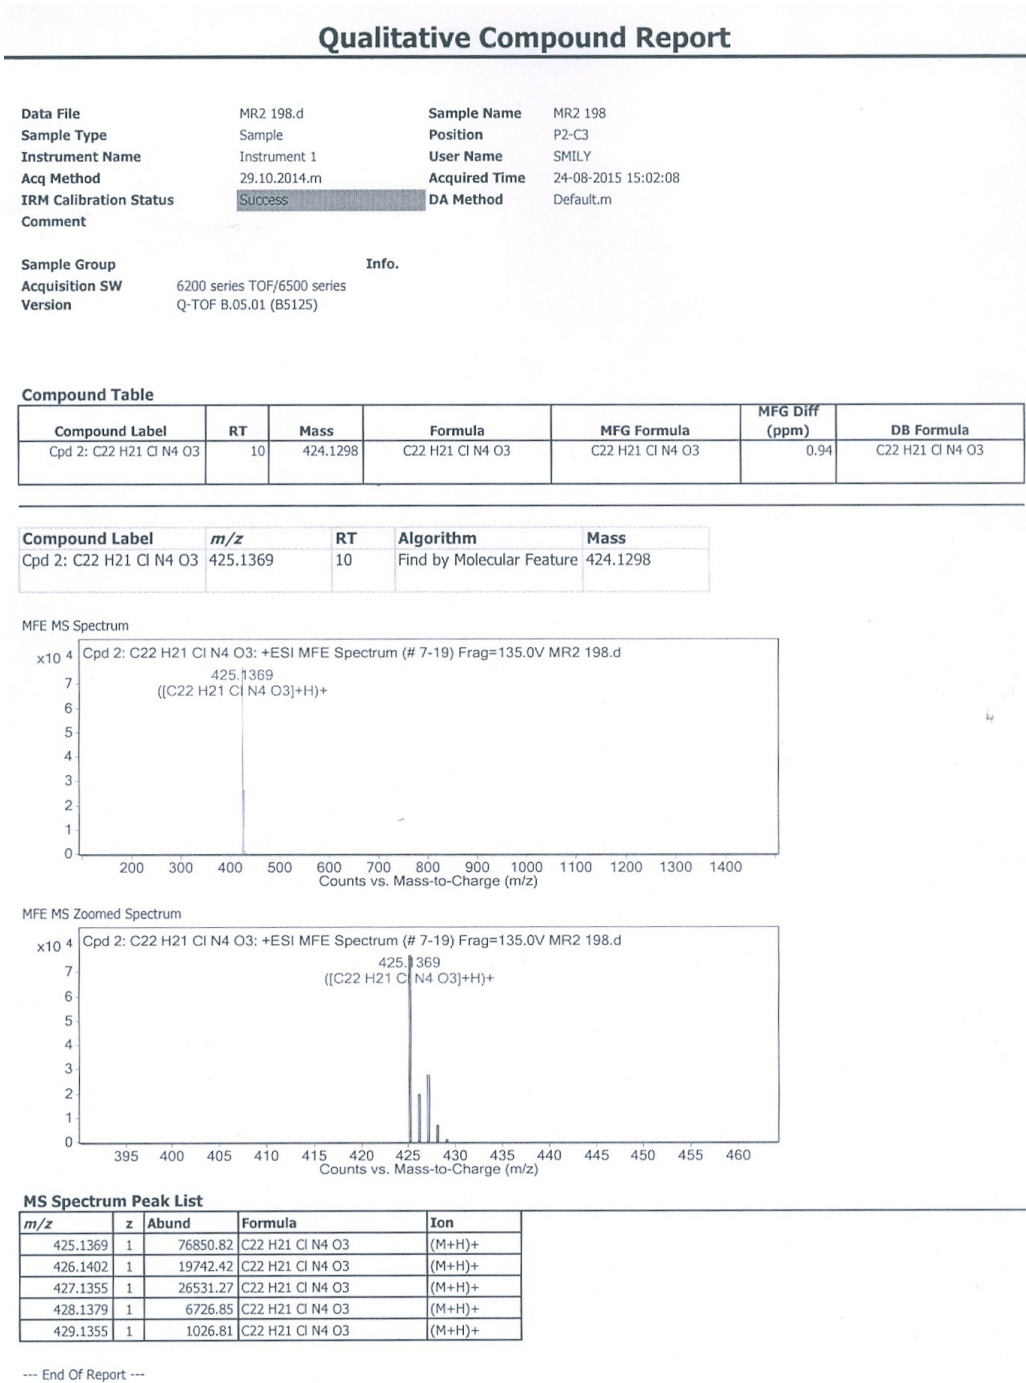

Figure 38: <sup>1</sup>H NMR spectrum of compound 4m in DMSO.

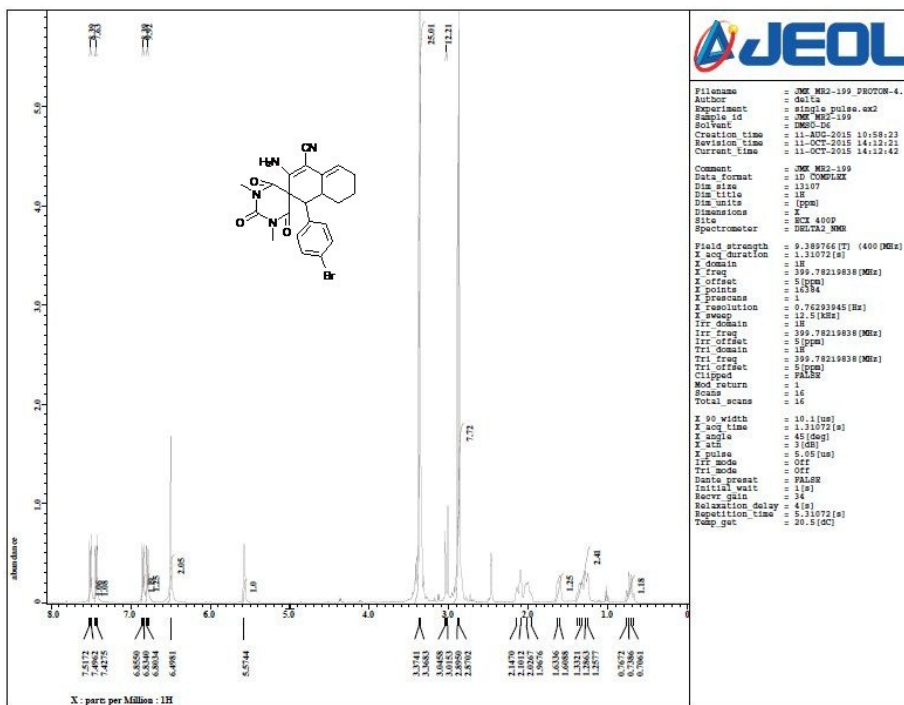

Figure 39: <sup>13</sup>C NMR spectrum of compound 4m in DMSO.

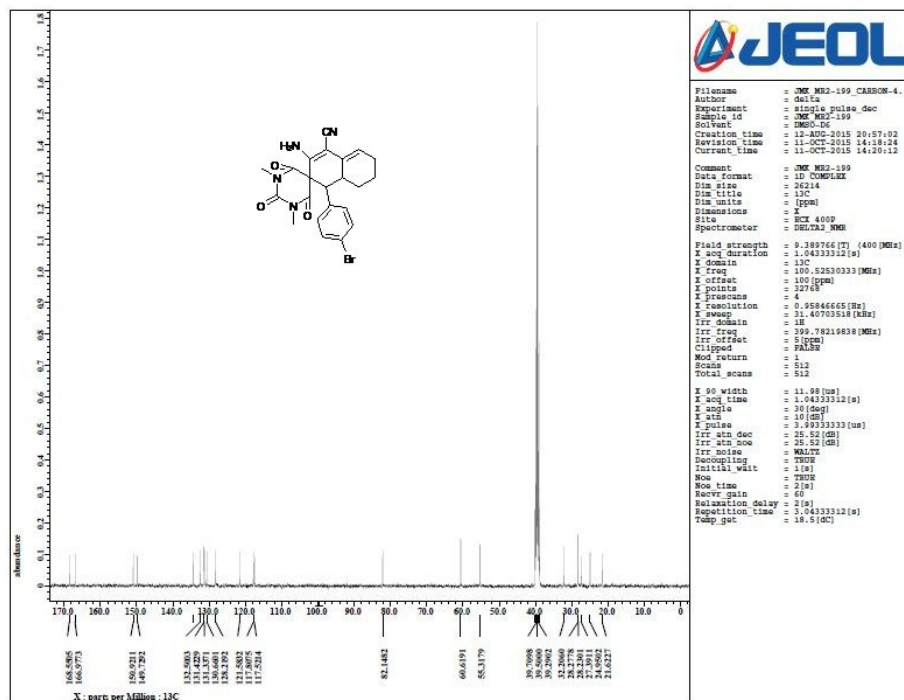

Figure 40: Mass spectrum of compound 4m.

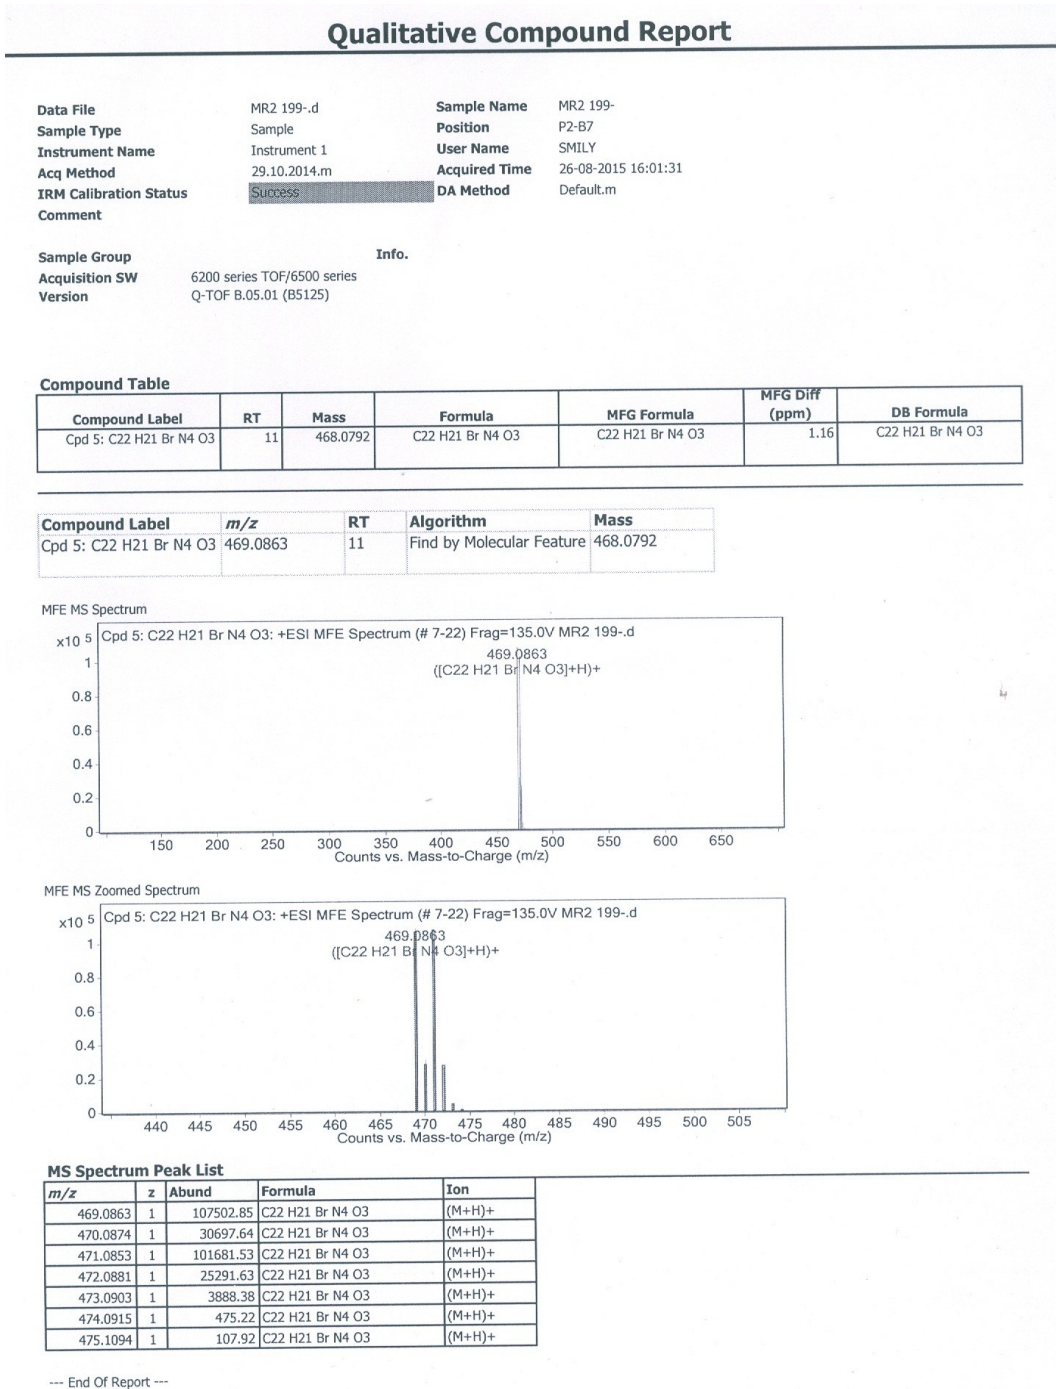



**Figure 43: Mass spectrum of compound 4n.**

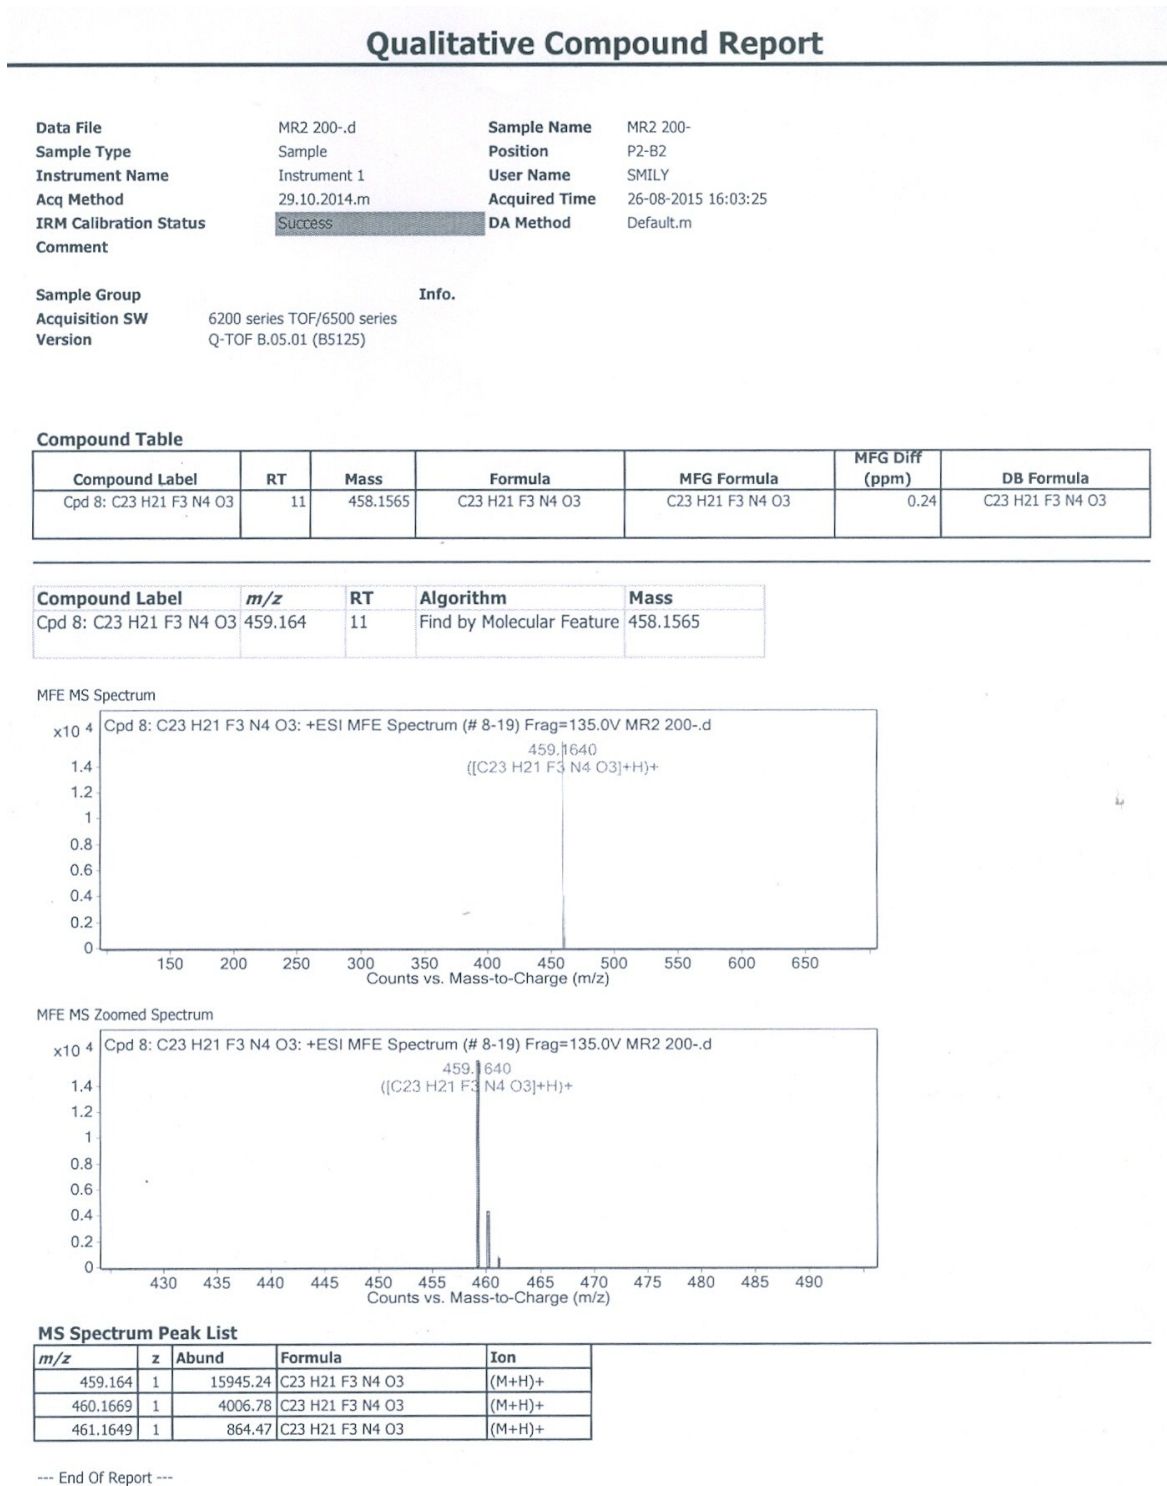



Figure 46: Mass spectrum of compound 4o.

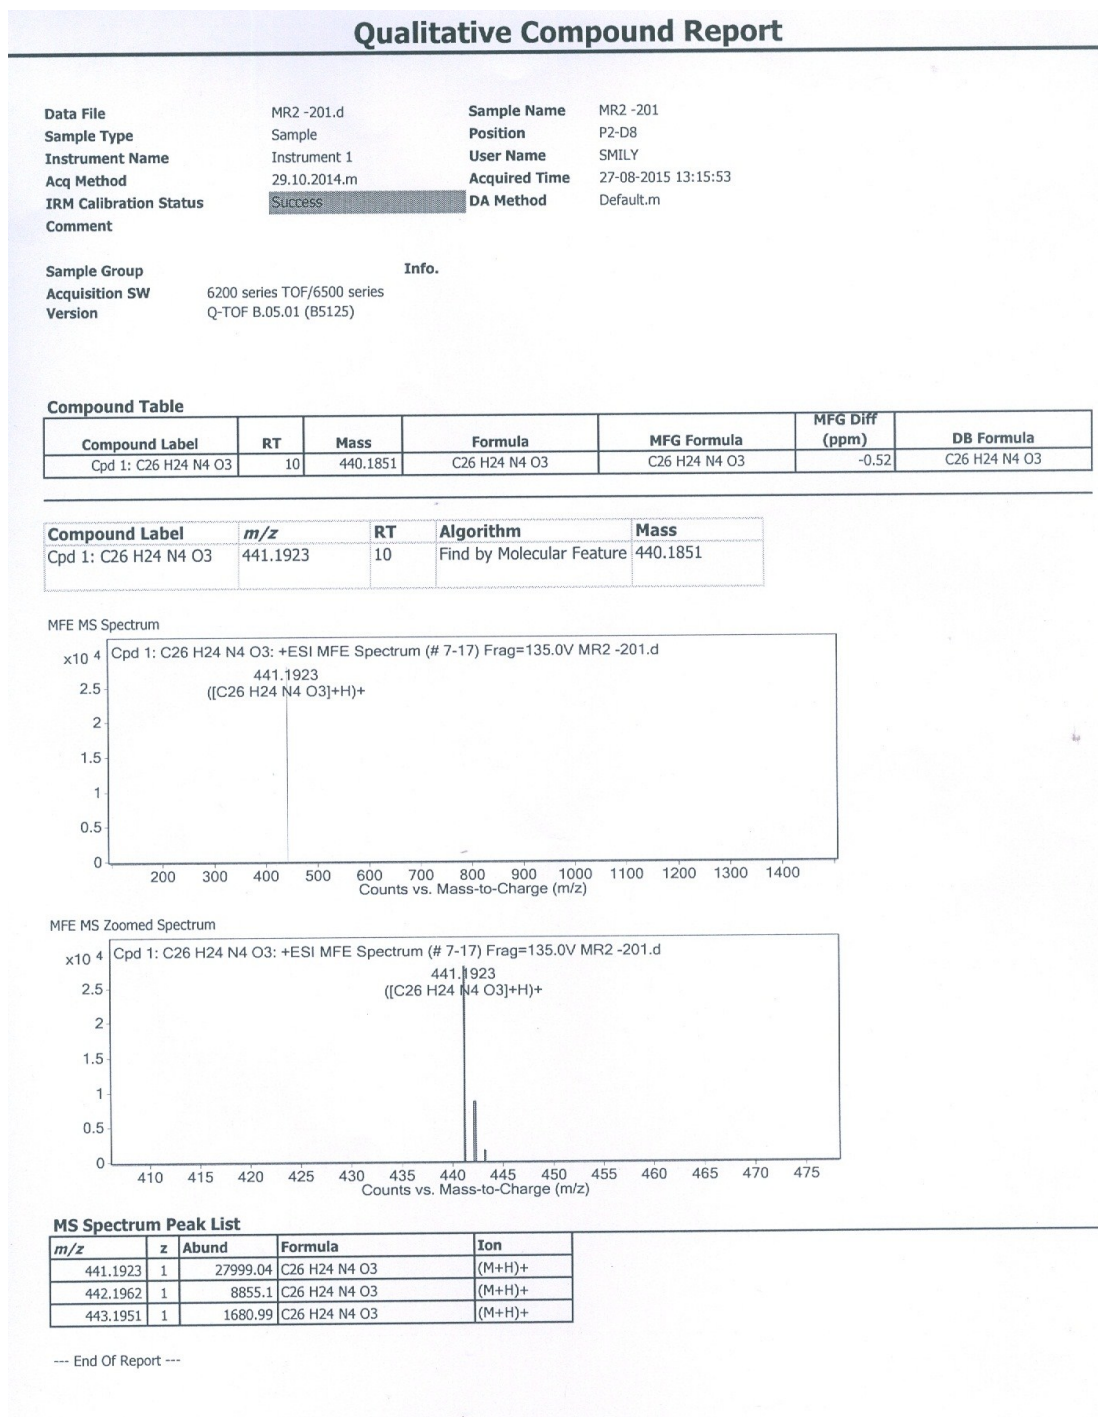



Figure 47:  $^1\text{H}$  NMR spectrum of compound **4p** in DMSO.

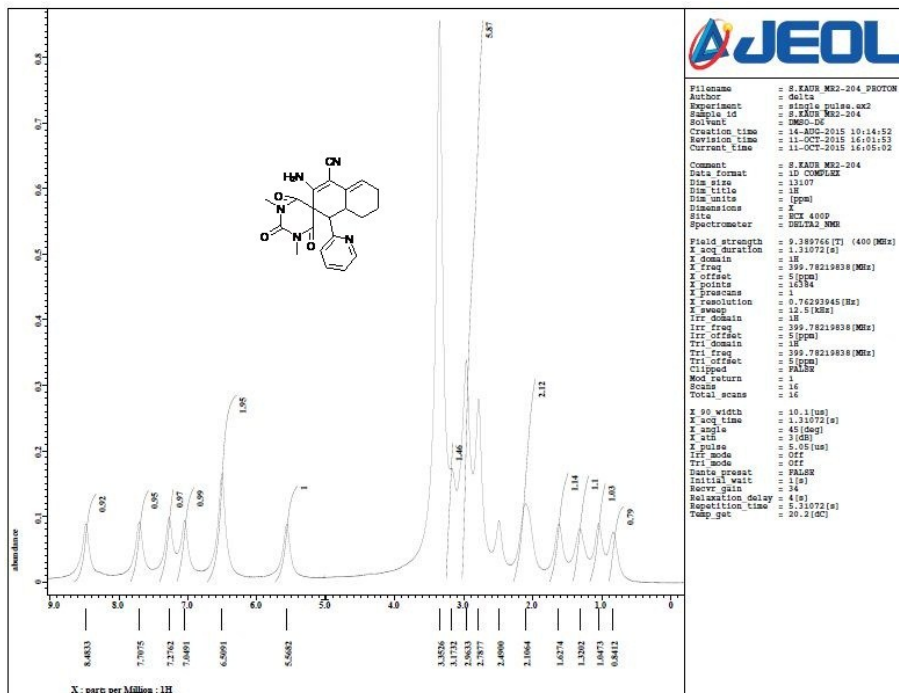

Figure 48:  $^{13}\text{C}$  NMR spectrum of compound **4p** in DMSO.

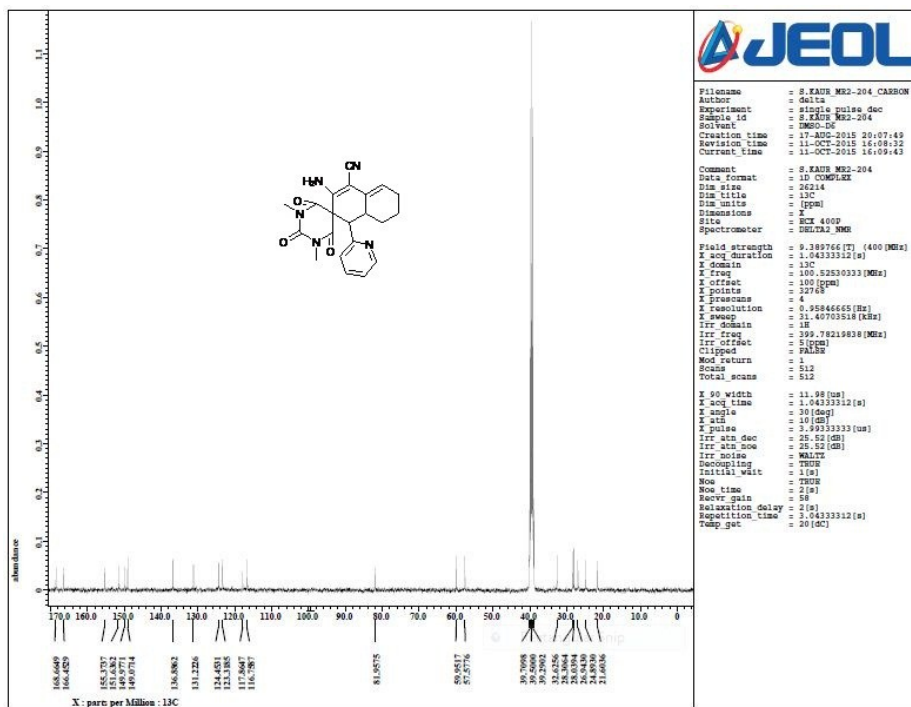

Figure 49: Mass spectrum of compound 4p.

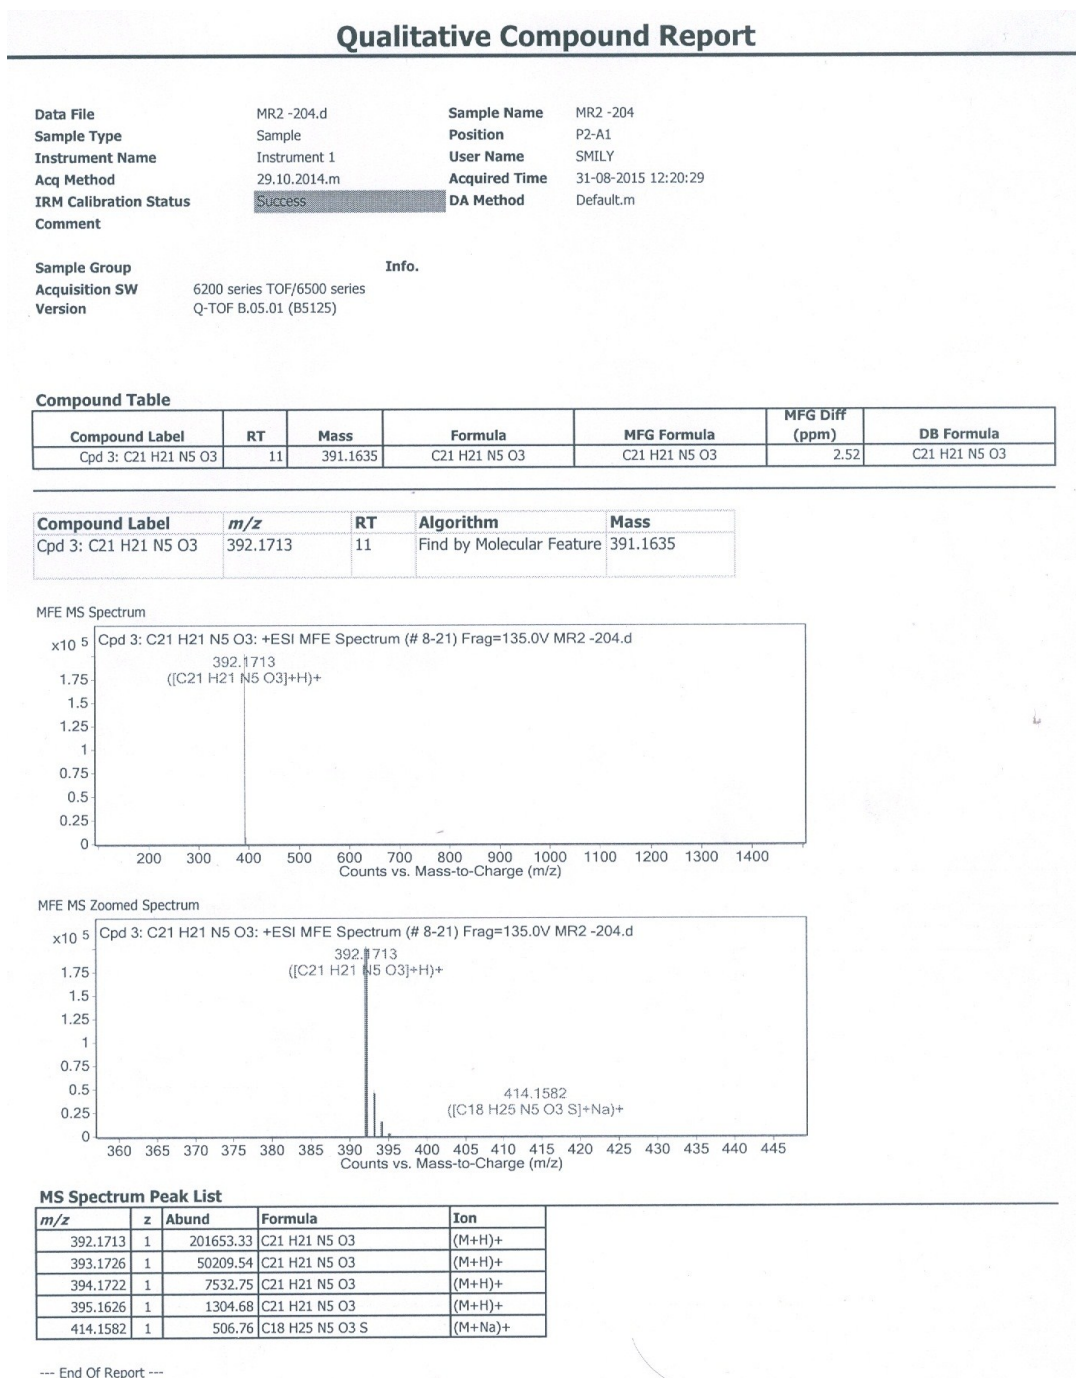

Figure 50:  $^1\text{H}$  NMR spectrum of compound **4q** in DMSO.

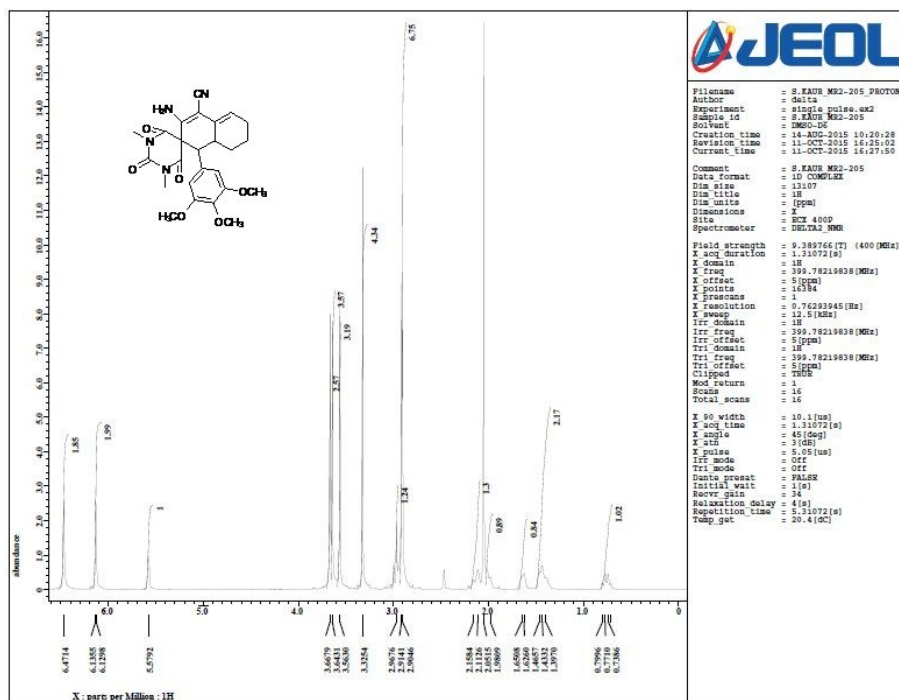

Figure 51:  $^{13}\text{C}$  NMR spectrum of compound **4q** in DMSO.

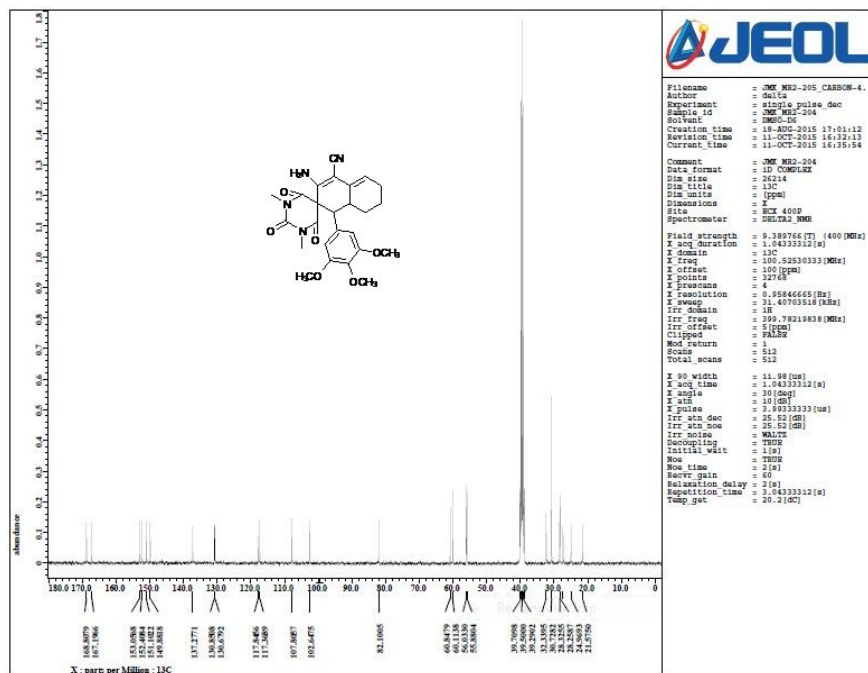

Figure 52: Mass spectrum of compound 4q.

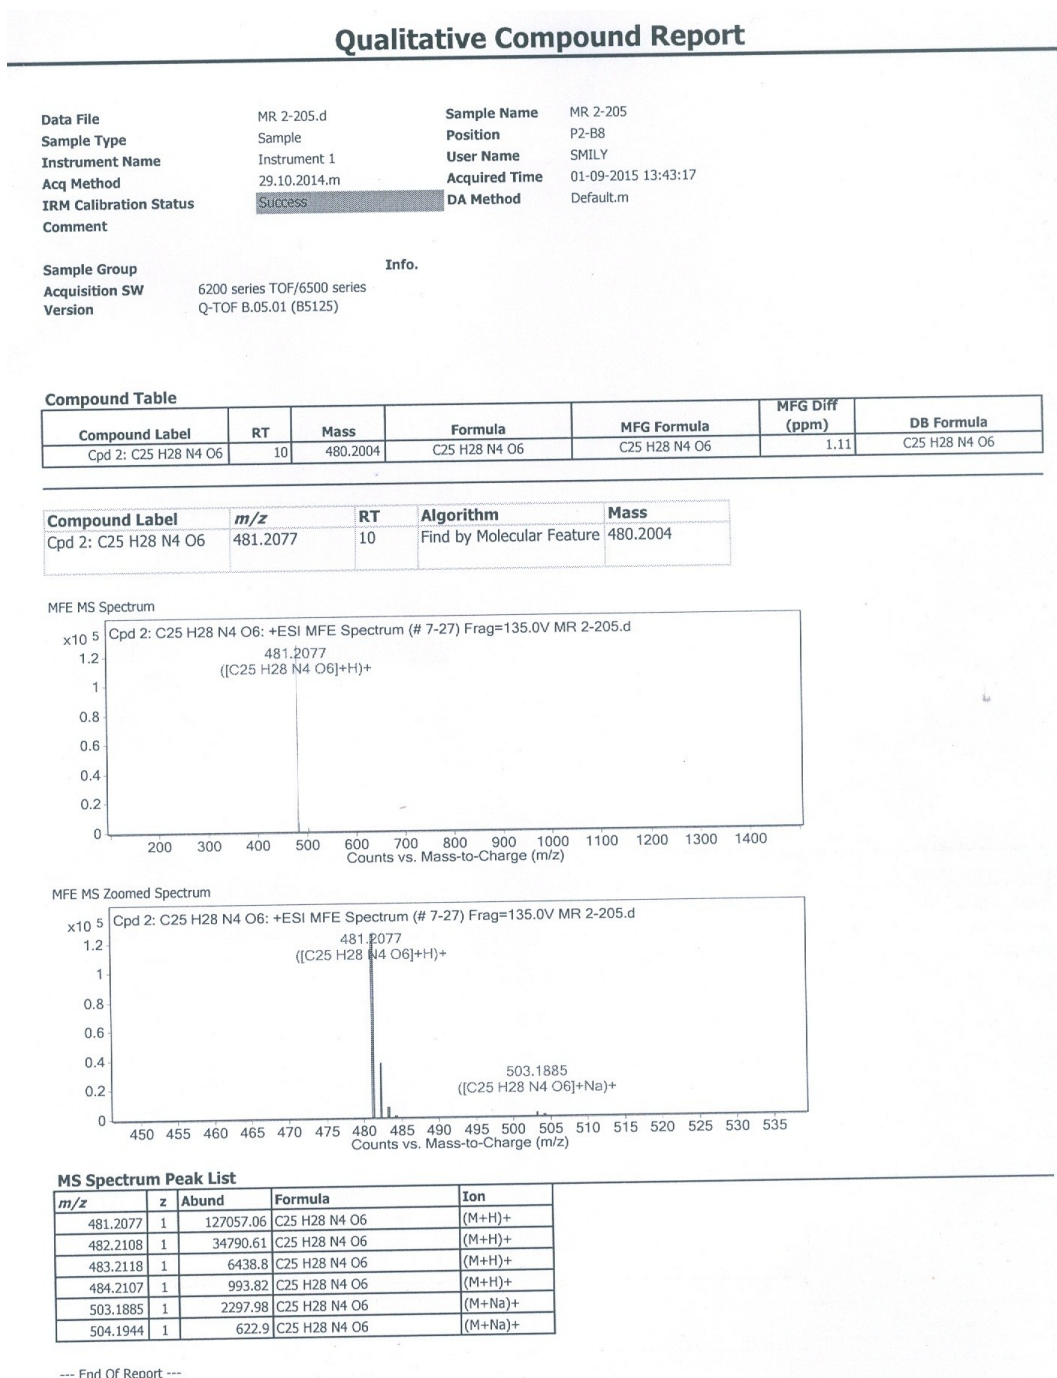

**Table 1:** Crystal data and structure refinement information for the compound **4a**.

| <b>Formula</b>                    | <b>C<sub>22</sub> H<sub>21</sub> Cl N<sub>4</sub> O<sub>3</sub></b>                                                               |
|-----------------------------------|-----------------------------------------------------------------------------------------------------------------------------------|
| Formula weight (g)                | : 424.88                                                                                                                          |
| Temperature                       | : 293(2) K                                                                                                                        |
| Wavelength                        | : 0.71073 Å                                                                                                                       |
| Crystal system, space group       | : monoclinic, I 2/a                                                                                                               |
| Unit cell dimensions              | : a = 22.6632(11) Å    alpha = 90.00 deg.<br>b = 10.9979(3) Å    beta = 110.416(5) deg.<br>c = 17.6446(8) Å    gamma = 90.00 deg. |
| Volume                            | : 4121.6 (3) Å <sup>3</sup>                                                                                                       |
| Z                                 | : 8 g/cm <sup>3</sup>                                                                                                             |
| Absorption coefficient            | : 0.217 mm <sup>-1</sup>                                                                                                          |
| F(000)                            | : 1776.0                                                                                                                          |
| Crystal size                      | : 0.04 X 0.03 X 0.01 mm                                                                                                           |
| Theta range for data collection   | : 2.96 to 25.00deg                                                                                                                |
| Limiting indices                  | : Limiting indices -26<=h<=26,<br>-13<=k<=13, -20<=l<=20                                                                          |
| Completeness to theta             | : 99.8%                                                                                                                           |
| Absorption correction             | : Semi-empirical from equivalents                                                                                                 |
| Max. and min. transmission        | : 1.00000 and 0.87298                                                                                                             |
| Refinement method                 | : Full-matrix least-squares on F <sup>2</sup>                                                                                     |
| Data / restraints / parameters    | : 3623/ 0 / 279                                                                                                                   |
| Goodness-of-fit on F <sup>2</sup> | : 0.983                                                                                                                           |
| Final R indices [I>2sigma(I)]     | : R1 = 0.0761, wR2 = 0.2198                                                                                                       |
| R indices (all data)              | : R1 = 0.1959, wR2 = 0.3623                                                                                                       |
| Largest diff. peak and hole       | : 0.46 and -0.19 e.Å <sup>-3</sup>                                                                                                |

**Table 2:** Intermolecular and intramolecular hydrogen bonding geometries of **4a**.

| D-H...A                         | D-H (Å) | H...A (Å) | D...A (Å) | D-H...A (°) |
|---------------------------------|---------|-----------|-----------|-------------|
| N(5)-H(15)...O(3) <sup>i</sup>  | 0.81    | 2.56      | 3.203(7)  | 137         |
| N(5)-H(25)...N(3) <sup>ii</sup> | 0.87    | 2.11      | 2.968(8)  | 171         |
| C(7)-H(7)...O(2) <sup>iii</sup> | 0.98    | 2.31      | 3.283(6)  | 171         |
| C(8)-H(8)...O(1)                | 0.98    | 2.48      | 3.120(6)  | 122         |
| C(2)-H(2)...CL(1) <sup>iv</sup> | 0.93    | 2.80      | 3.622(5)  | 147         |
| C(20)-H(20A)...O(3)             | 0.96    | 2.27      | 2.709(7)  | 107         |
| C(21)-H(21A)...O(3)             | 0.96    | 2.24      | 2.681(7)  | 107         |

Note: D, Donor; A, Acceptor; Symmetry code: i)  $-x, 1/2+y, 1/2-z$ ; ii)  $-x, -1/2+y, 1/2-z$ ; iii)  $-x, 2-y, -z$ ; iv)  $1/2-x, y, -z$

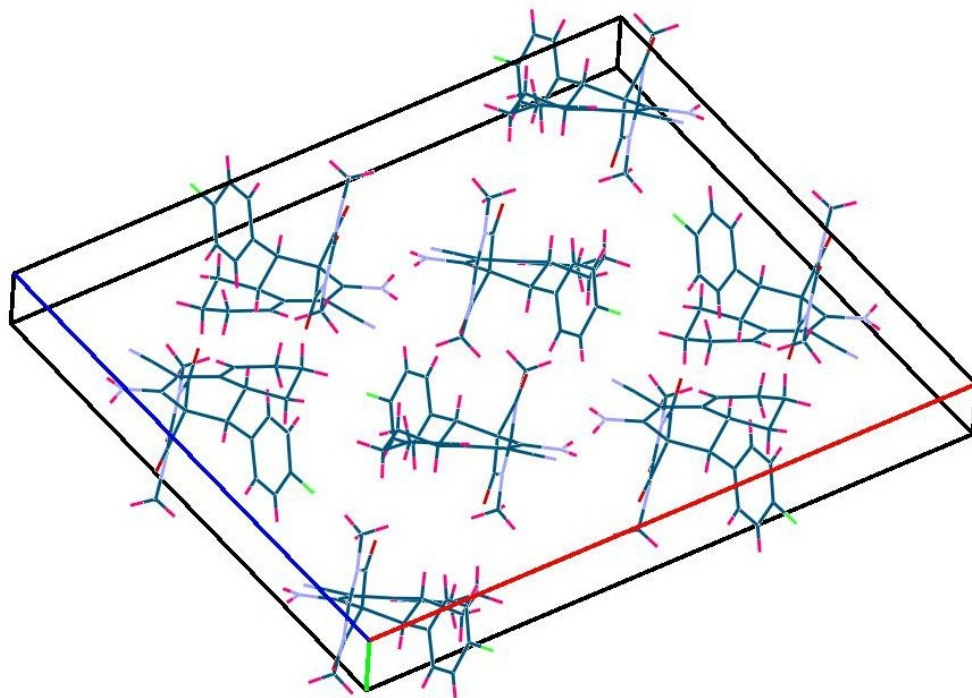

(a)

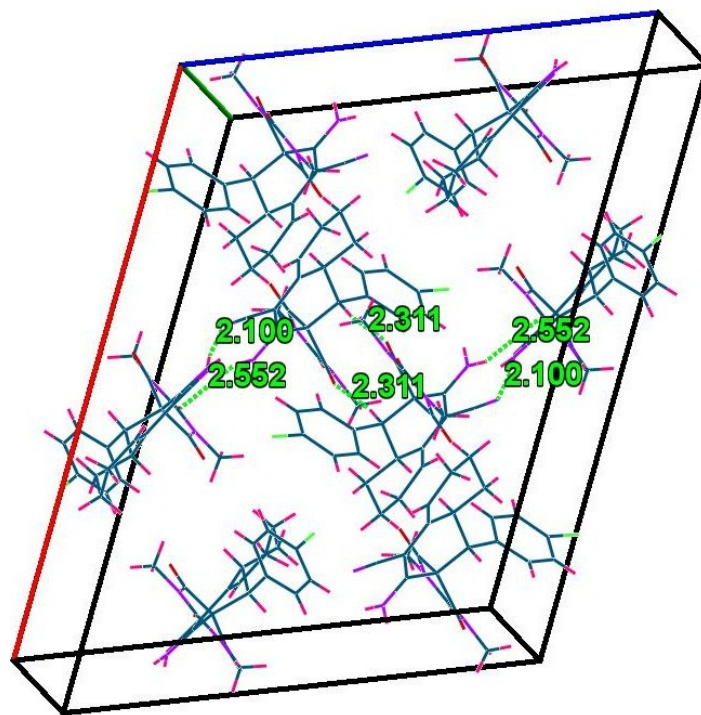

(b)

**Figure 53:** (a) Packing of the crystal in single unit cell (b) Intermolecular H-bonding of compound **4a**.
